# Supplementary material for: Biomimetic synthesis of the non-canonical PPAP natural products yezo'otogirin C and hypermogin D, and studies towards the synthesis of norascyronone A
Source: Royal Society of Chemistry journal article supplement (doi:10.1039/d2ob00074a), 2022-01-01
Supplement: d2ob00074a1.pdf [file d2ob00074a1.pdf]

**Biomimetic Synthesis of the Non-Canonical PPAP Natural Products Yezo'otogirin C and  
Hypermogin D, and Studies Towards the Synthesis of Norascyronone A**

Stefania A. Sassnink, Quang D. Phan, Hiu C. Lam, Aaron J. Day,  
Lauren A. M. Murray, and Jonathan H. George\*

*Department of Chemistry, University of Adelaide, Adelaide, SA 5005, Australia.*

**Supporting Information**

**Table of Contents**

|                                            |    |
|--------------------------------------------|----|
| 1. NMR spectra                             | 2  |
| 2. Tables of NMR data for natural products | 29 |

# 1. NMR spectra

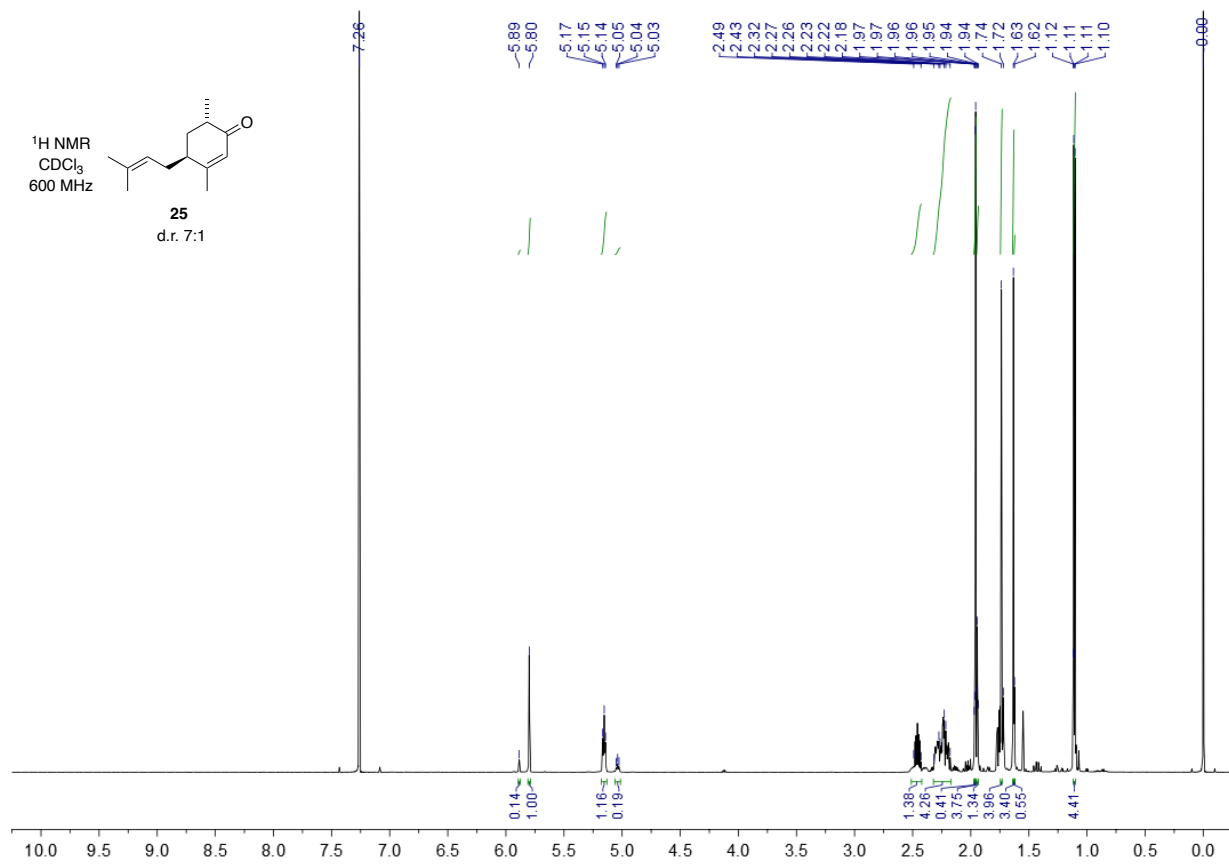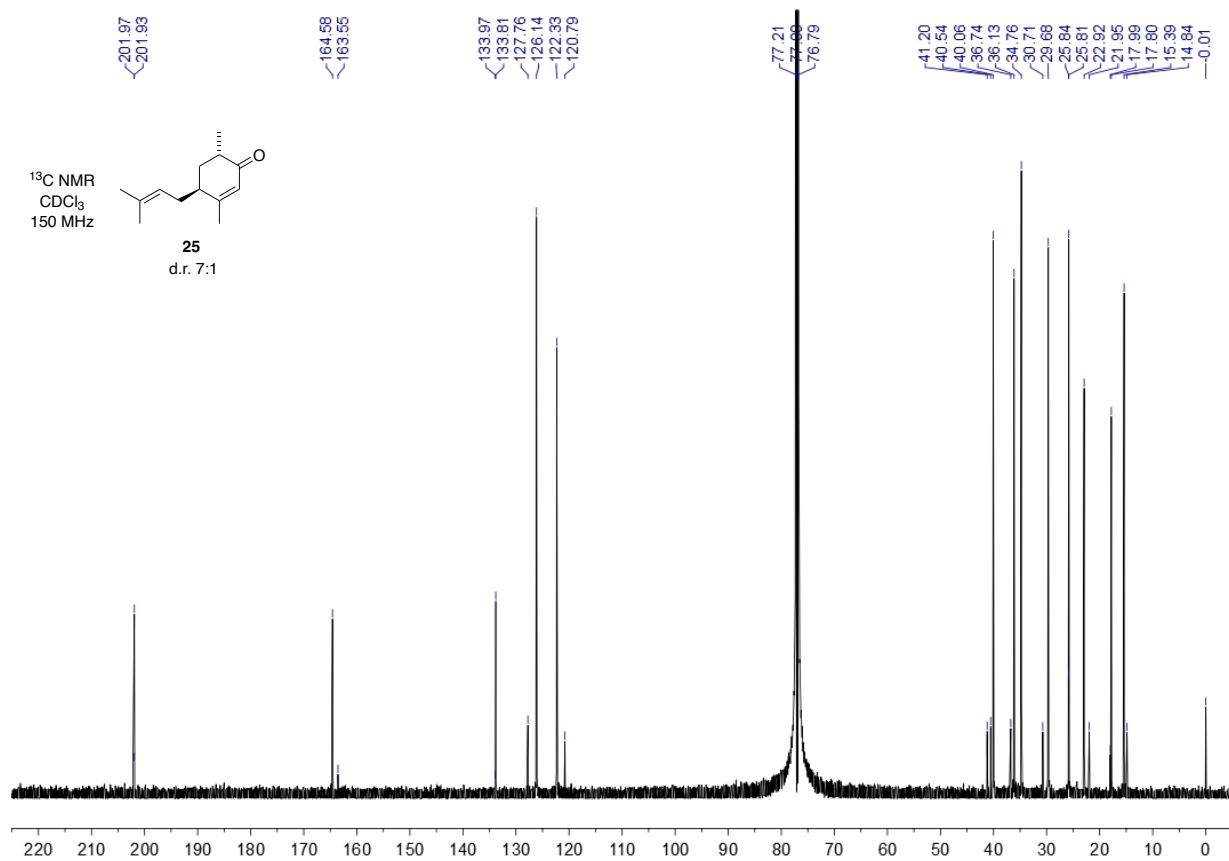



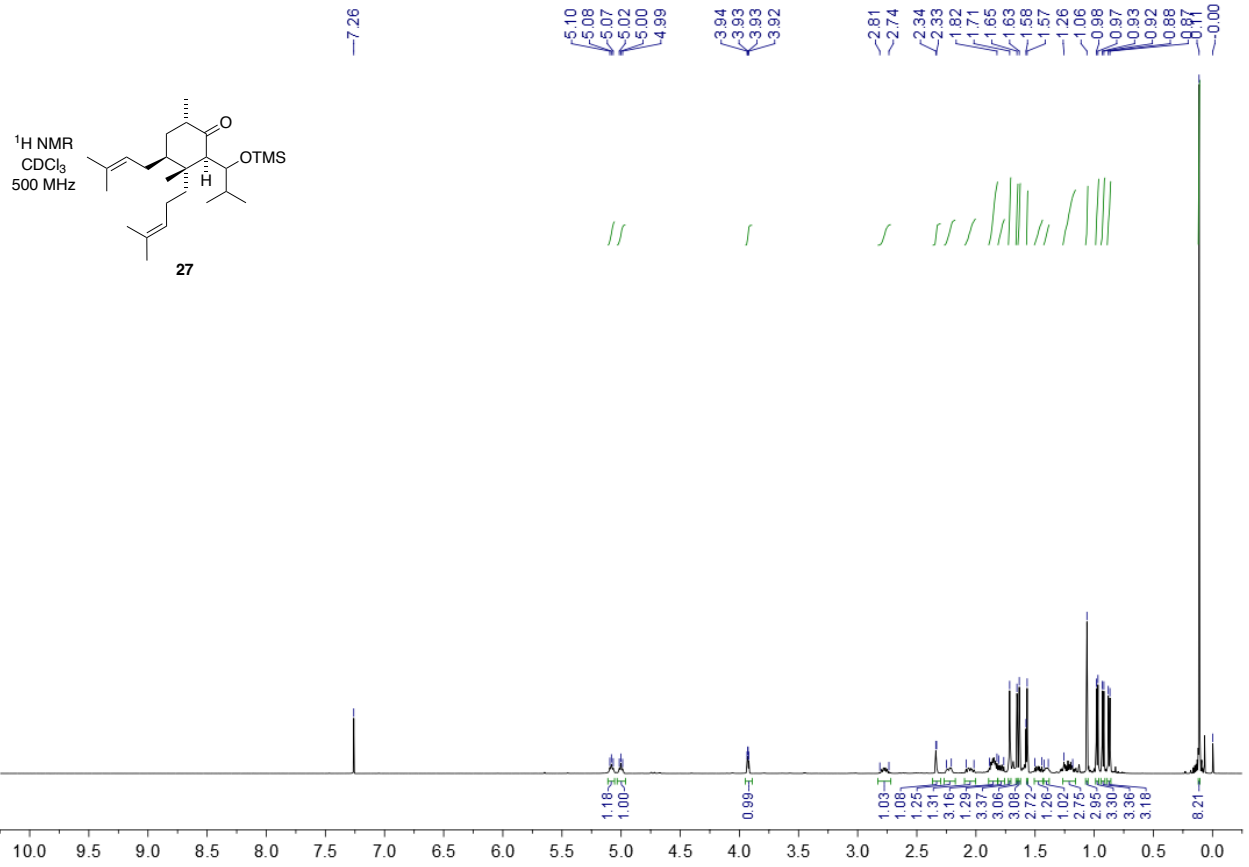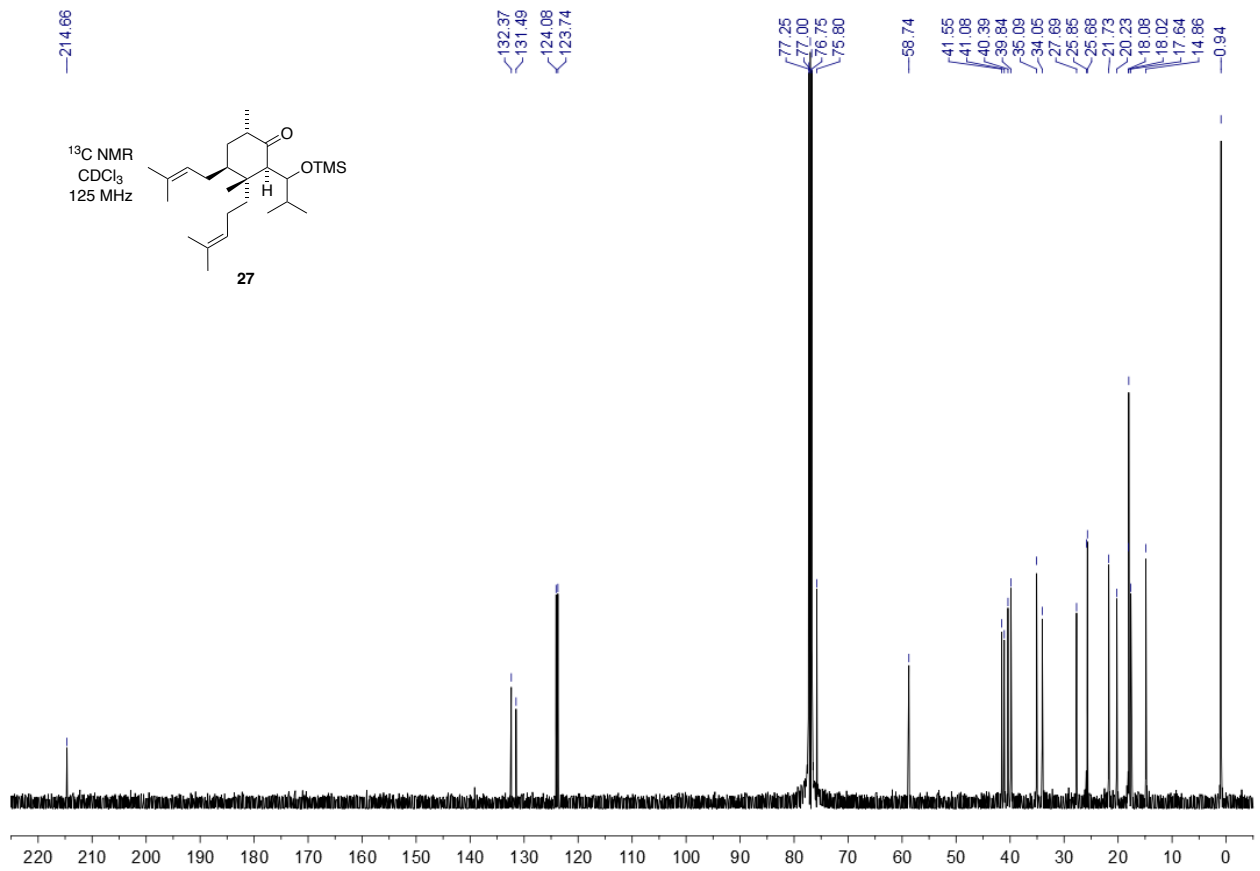

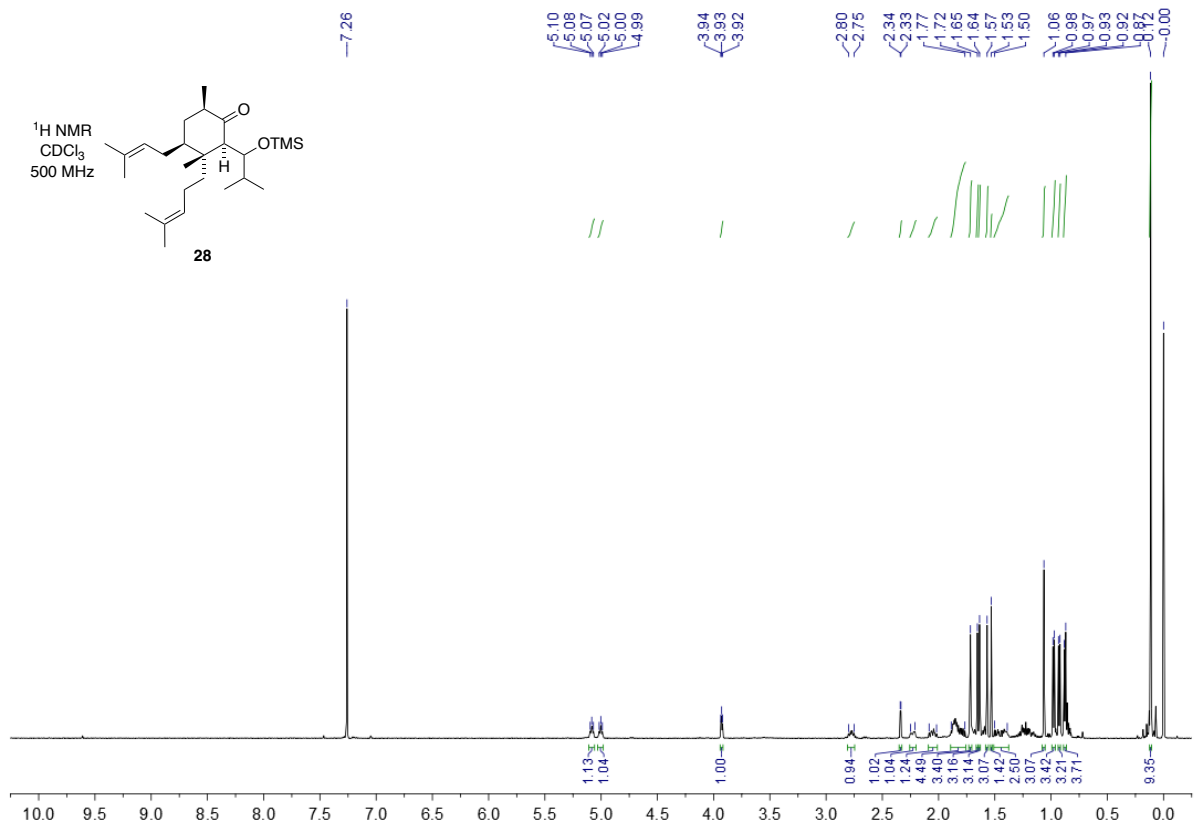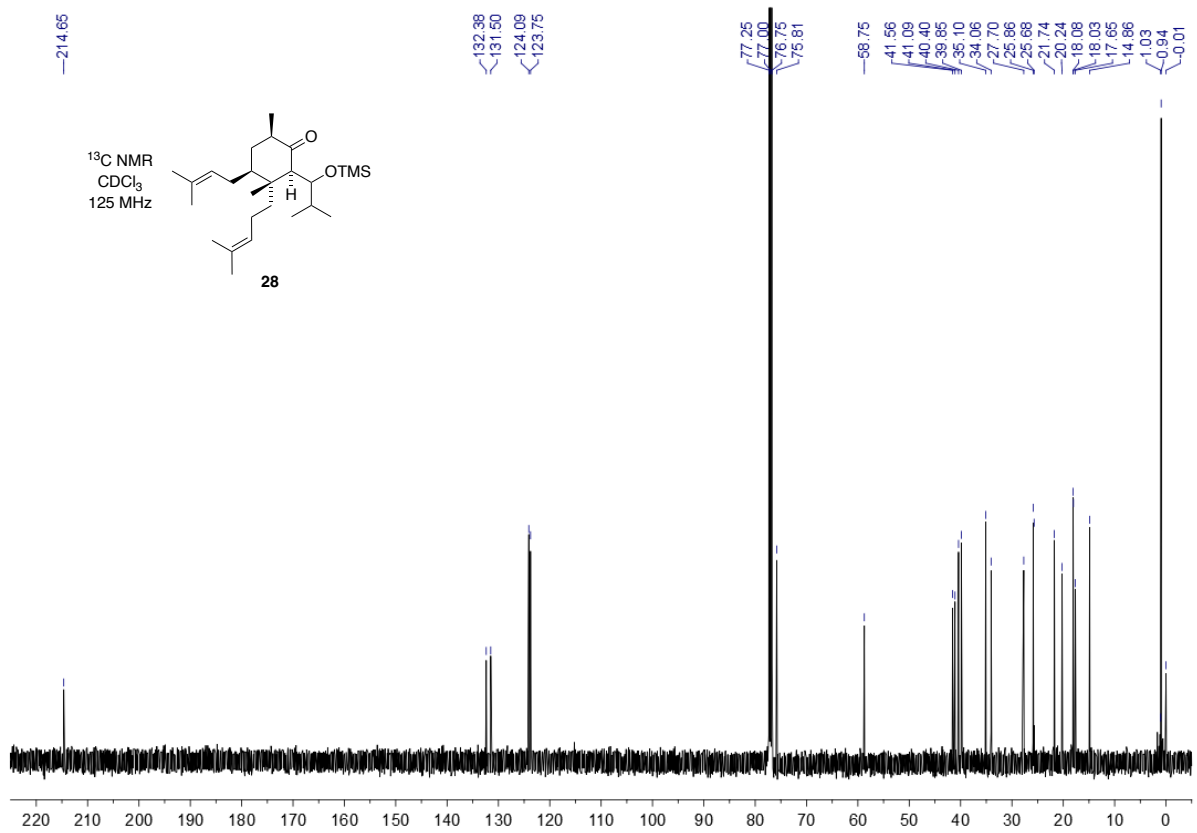

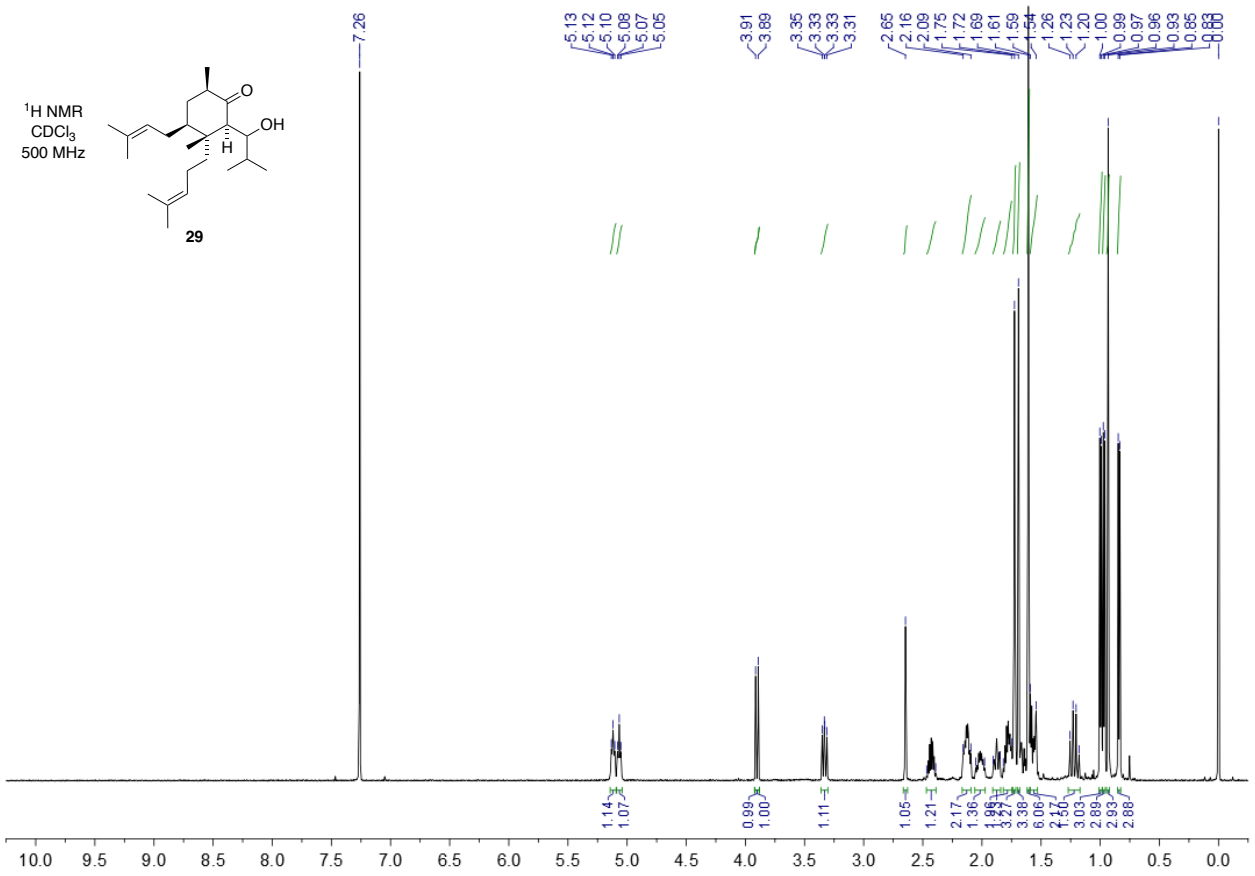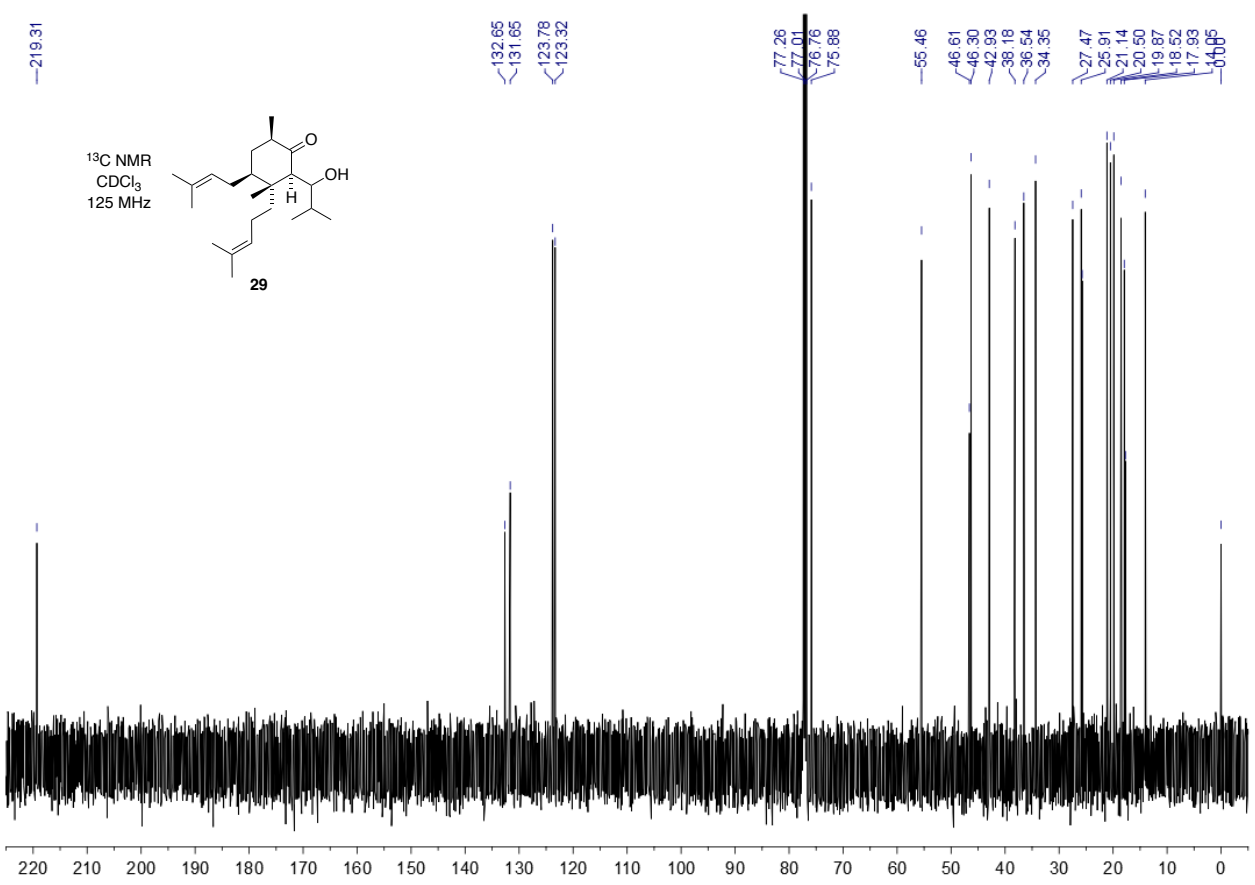

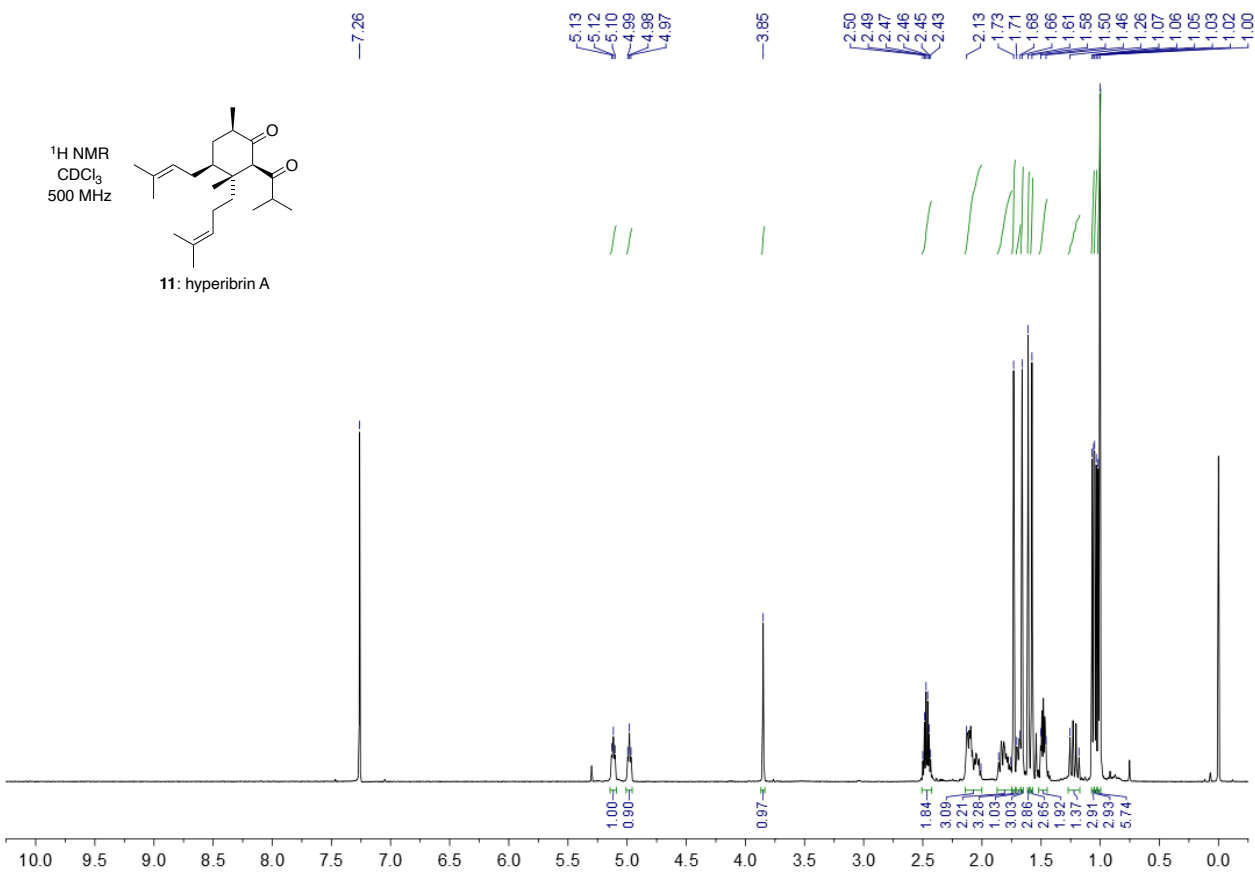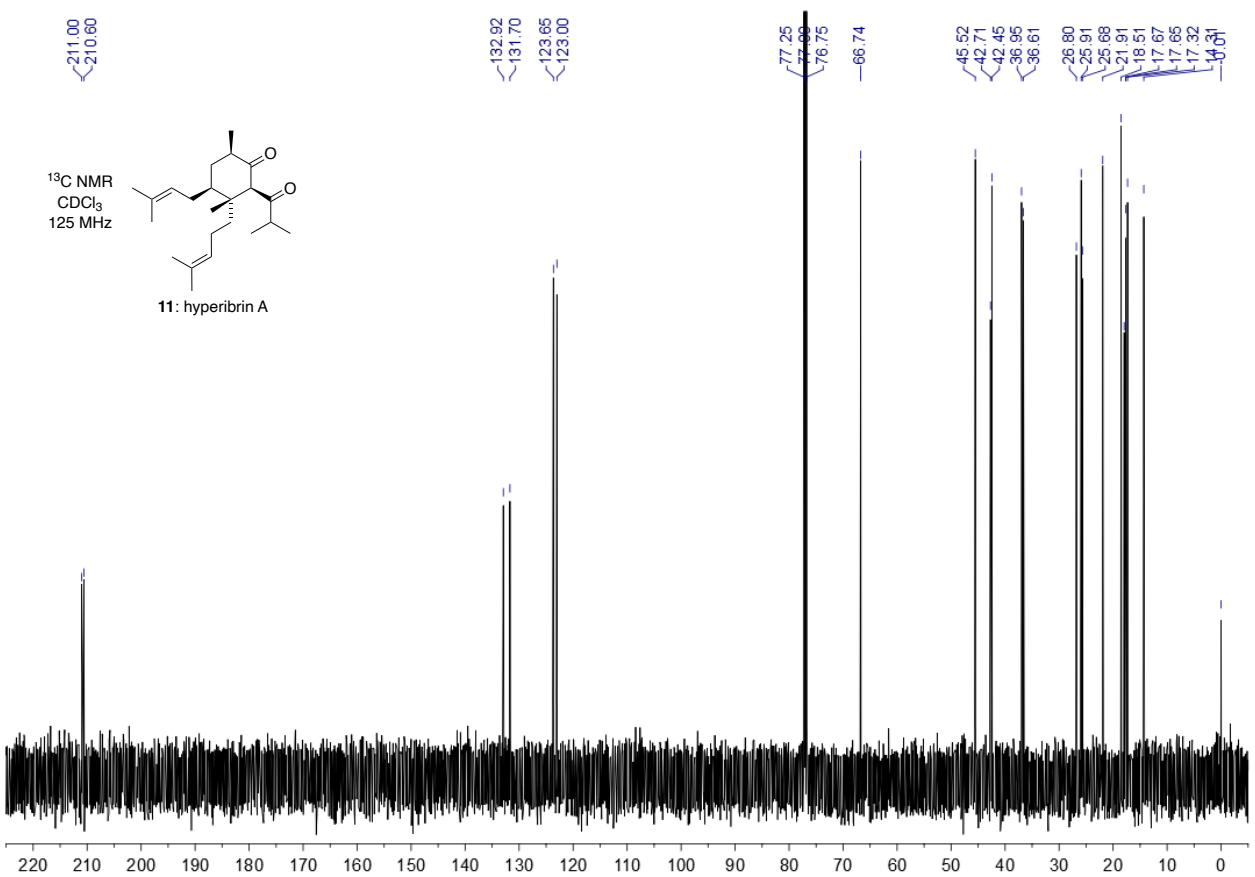

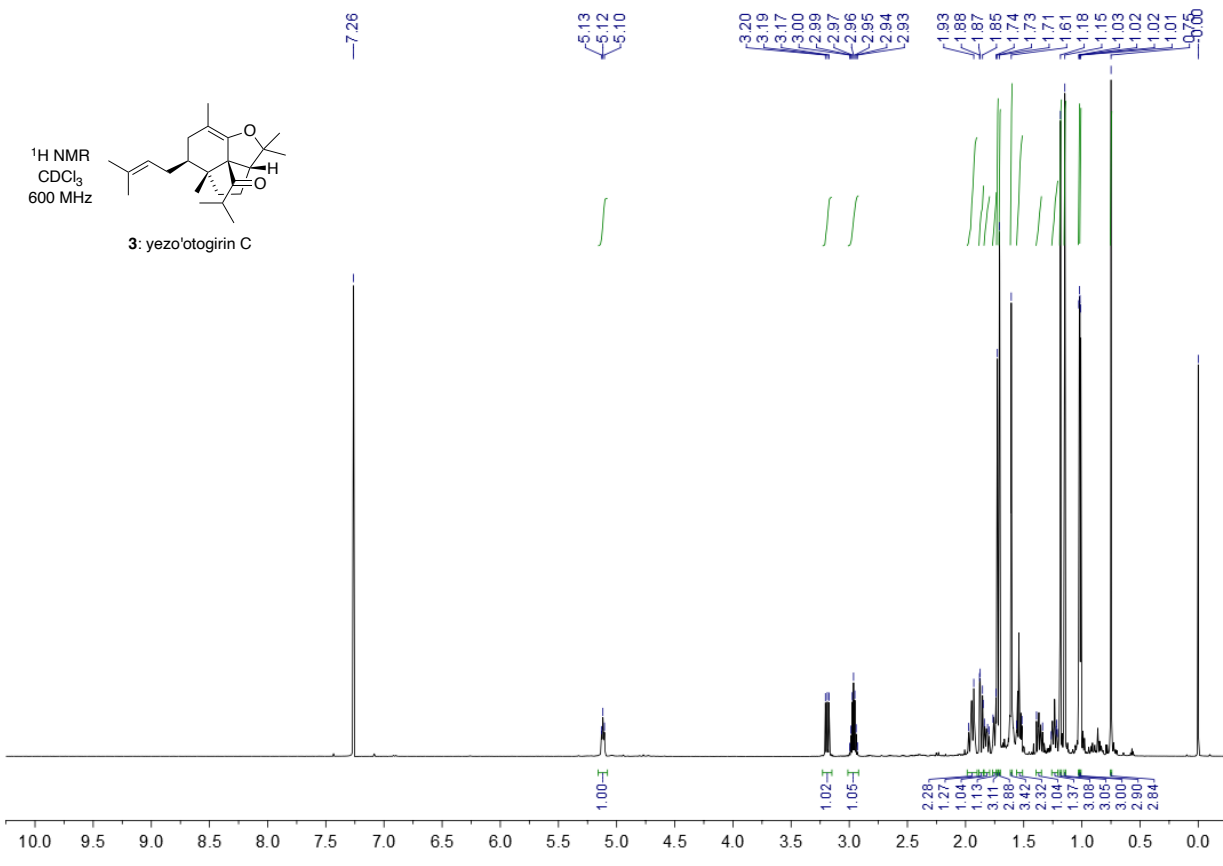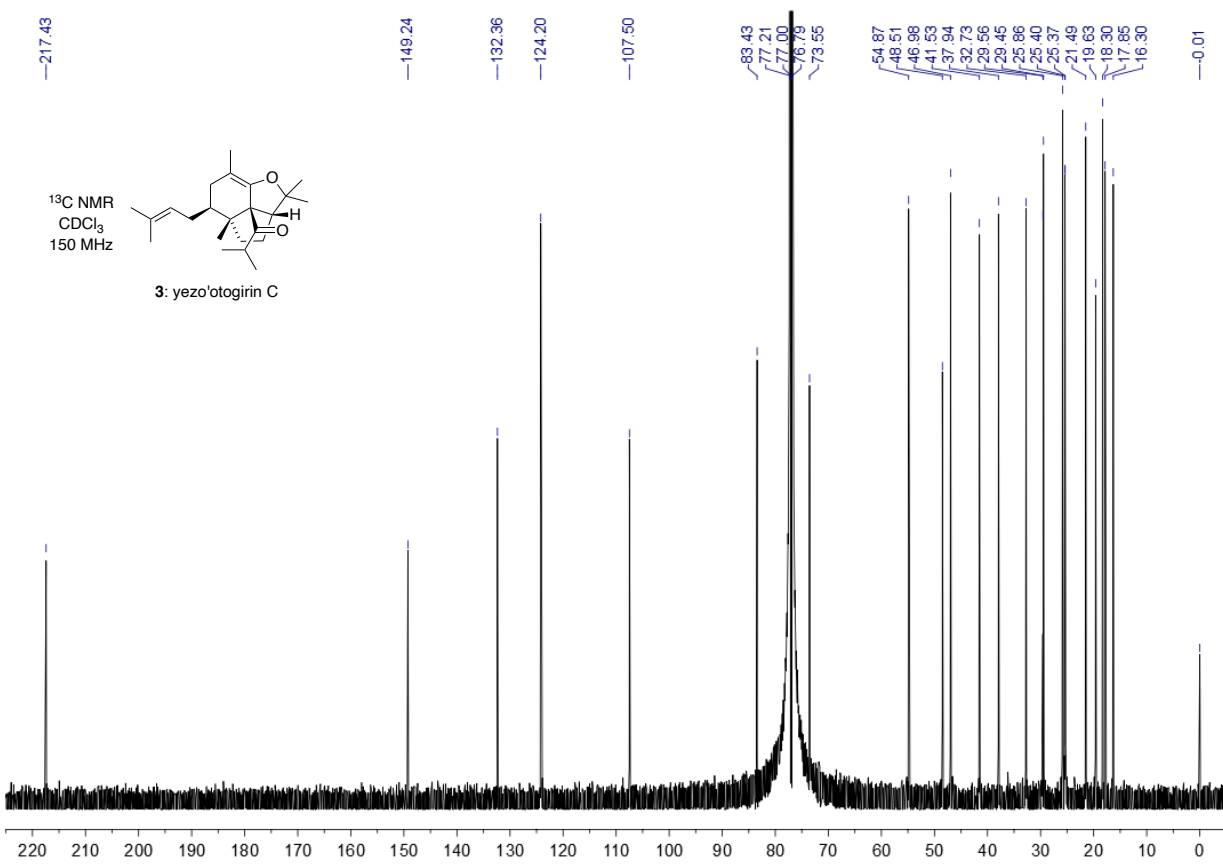



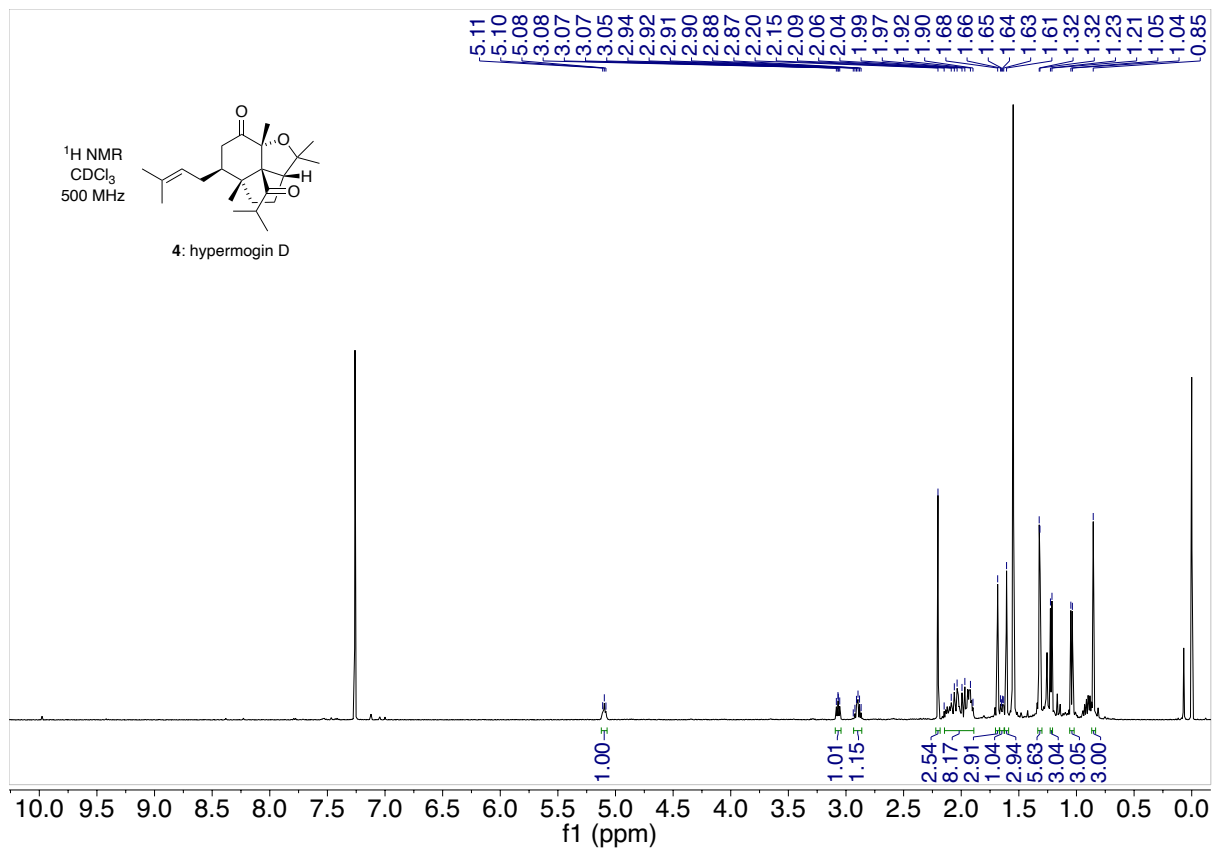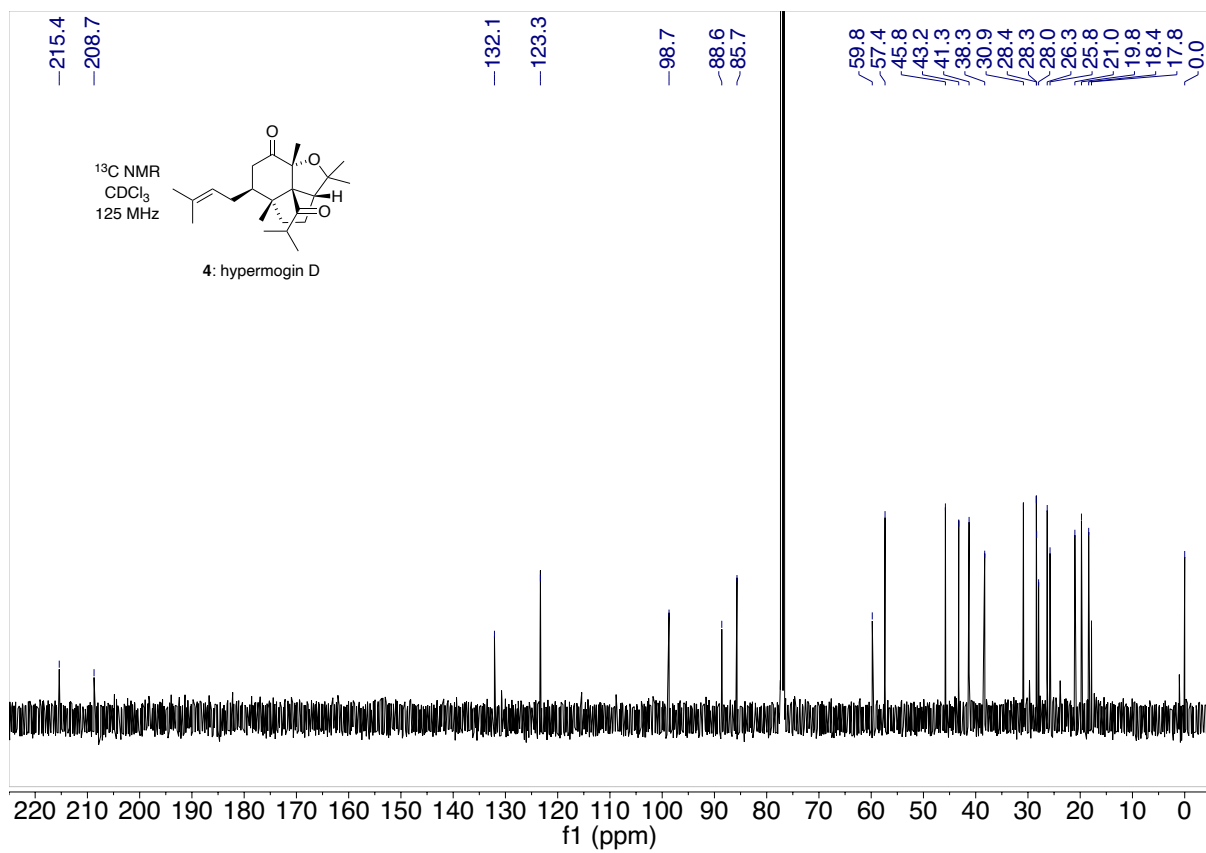

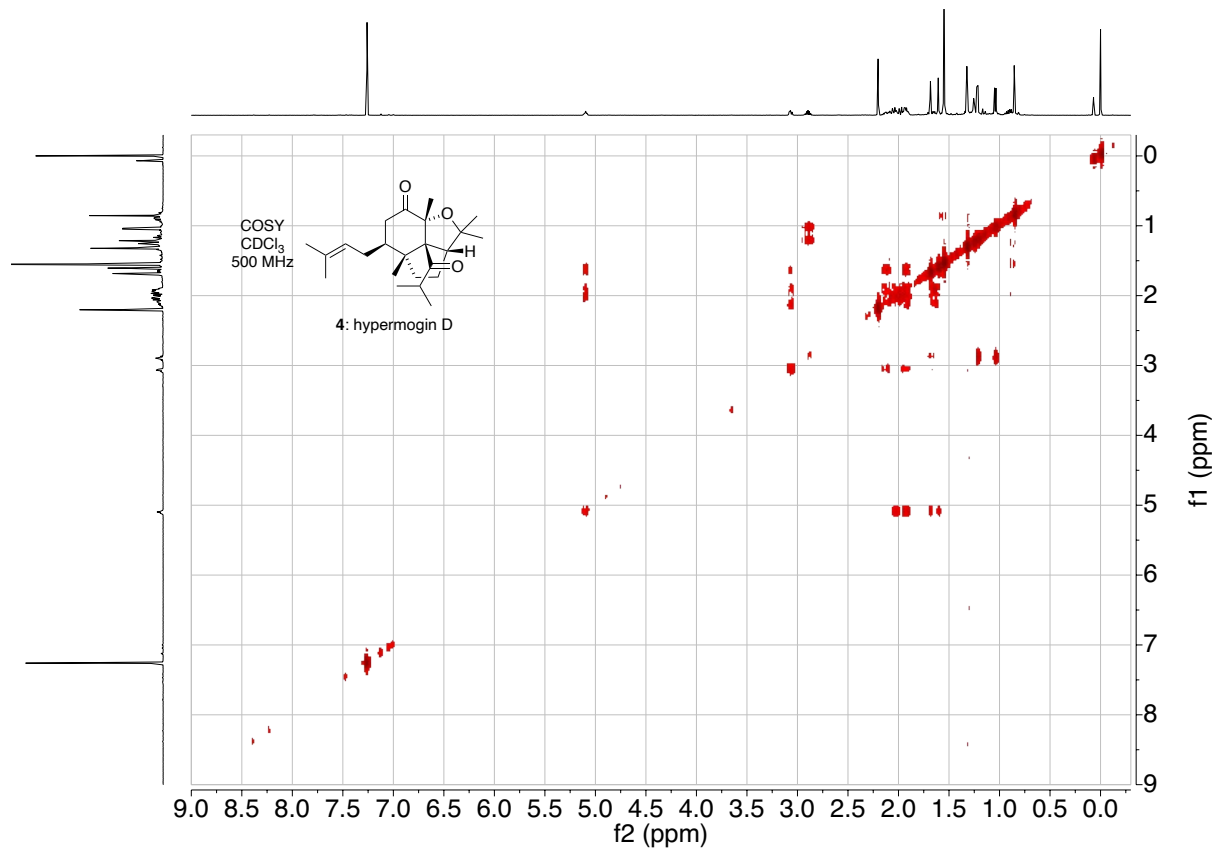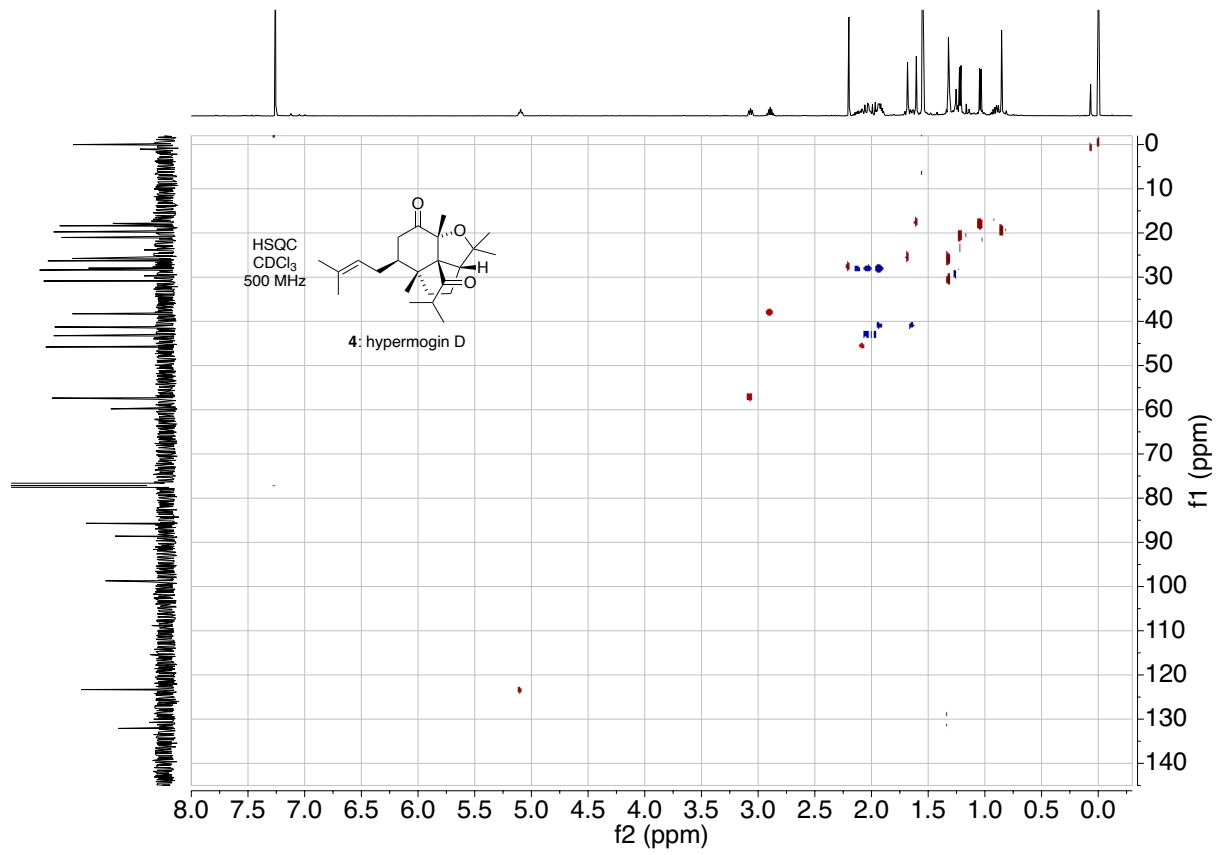

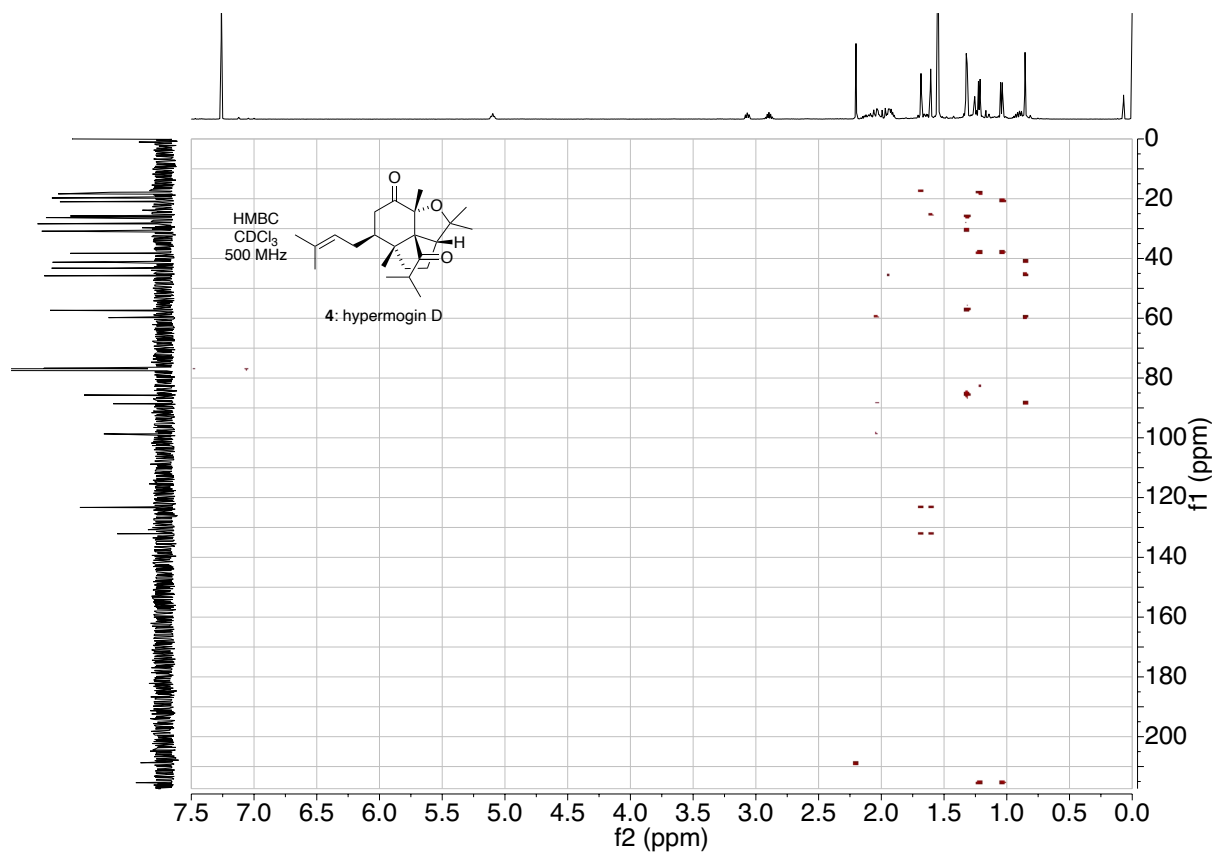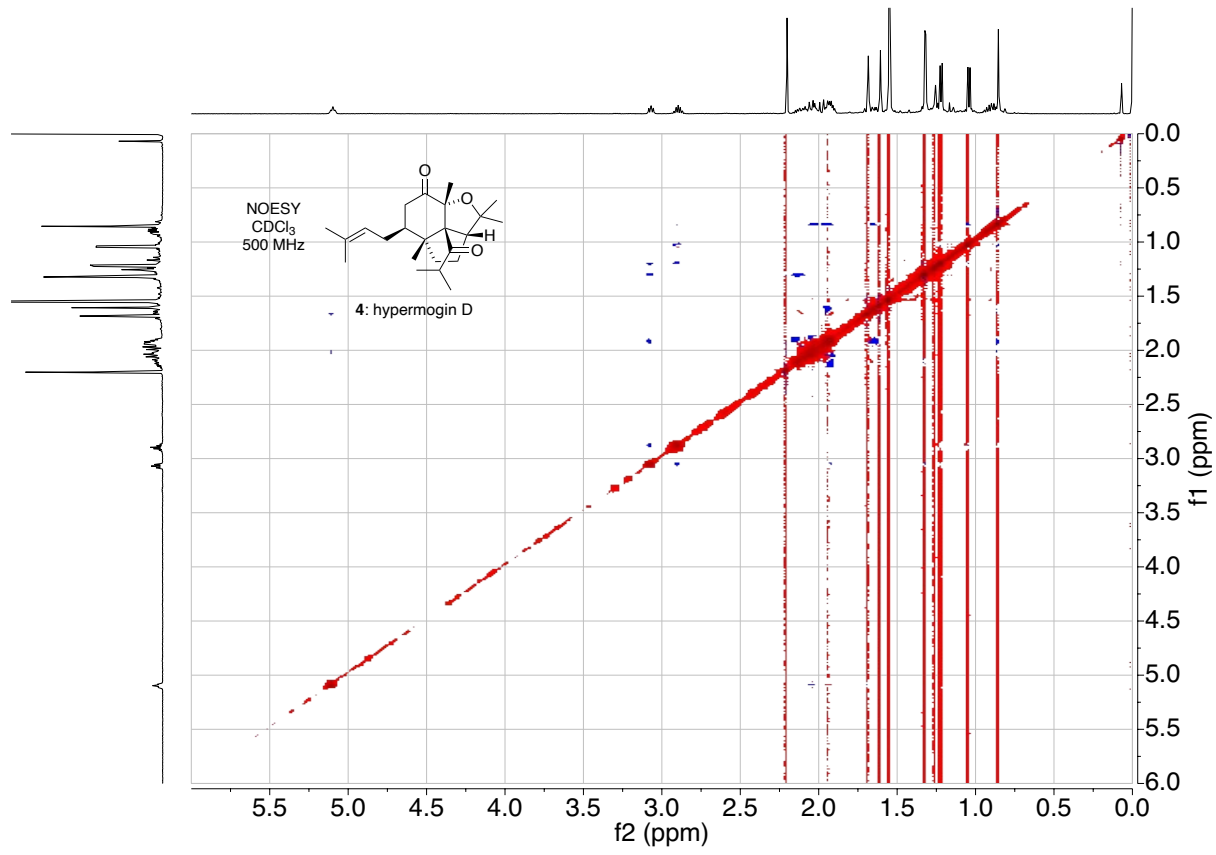

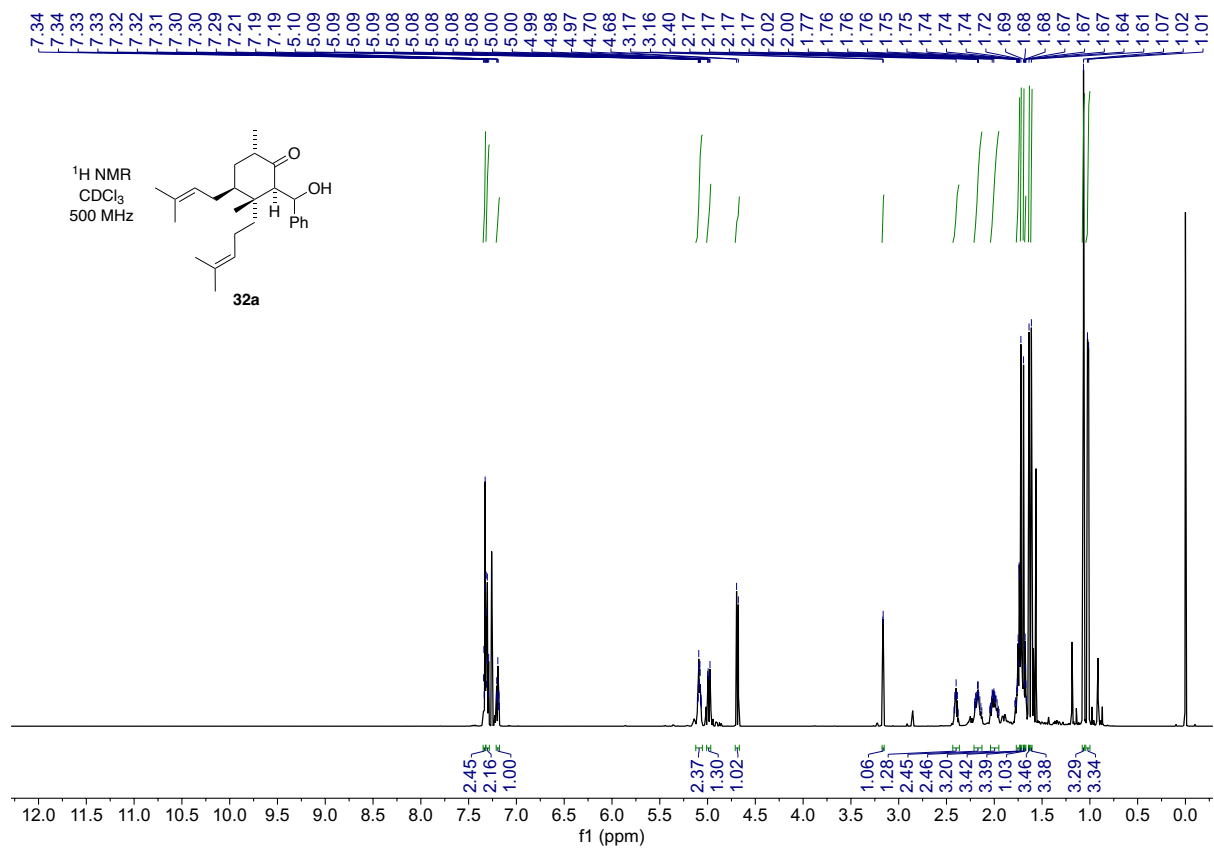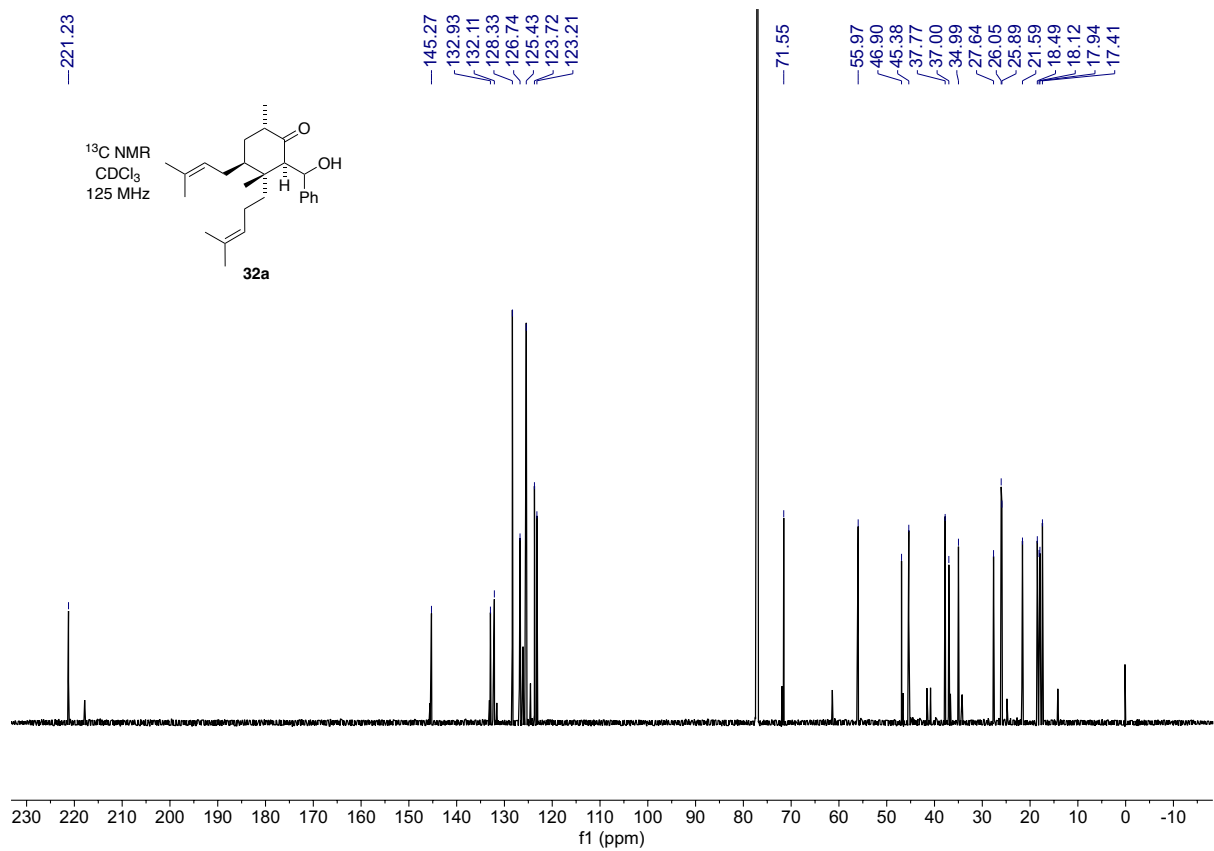

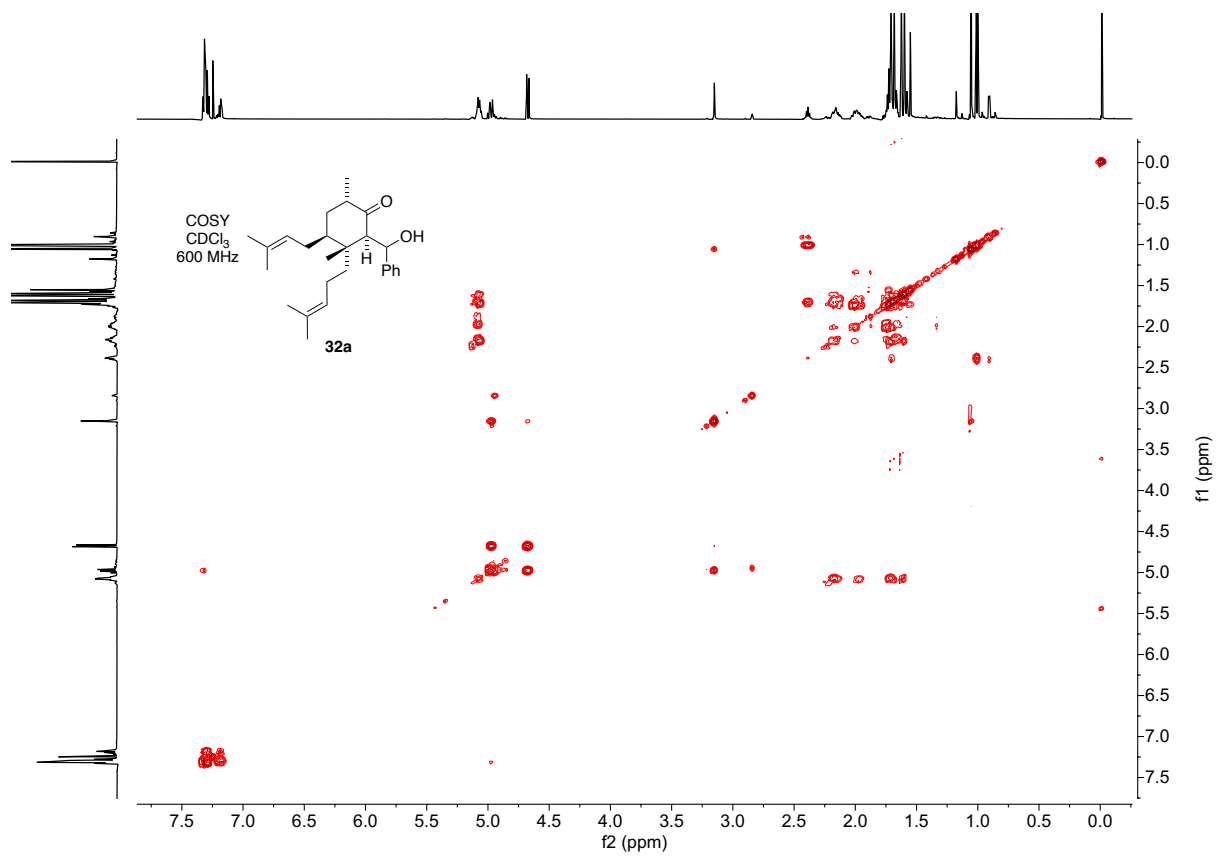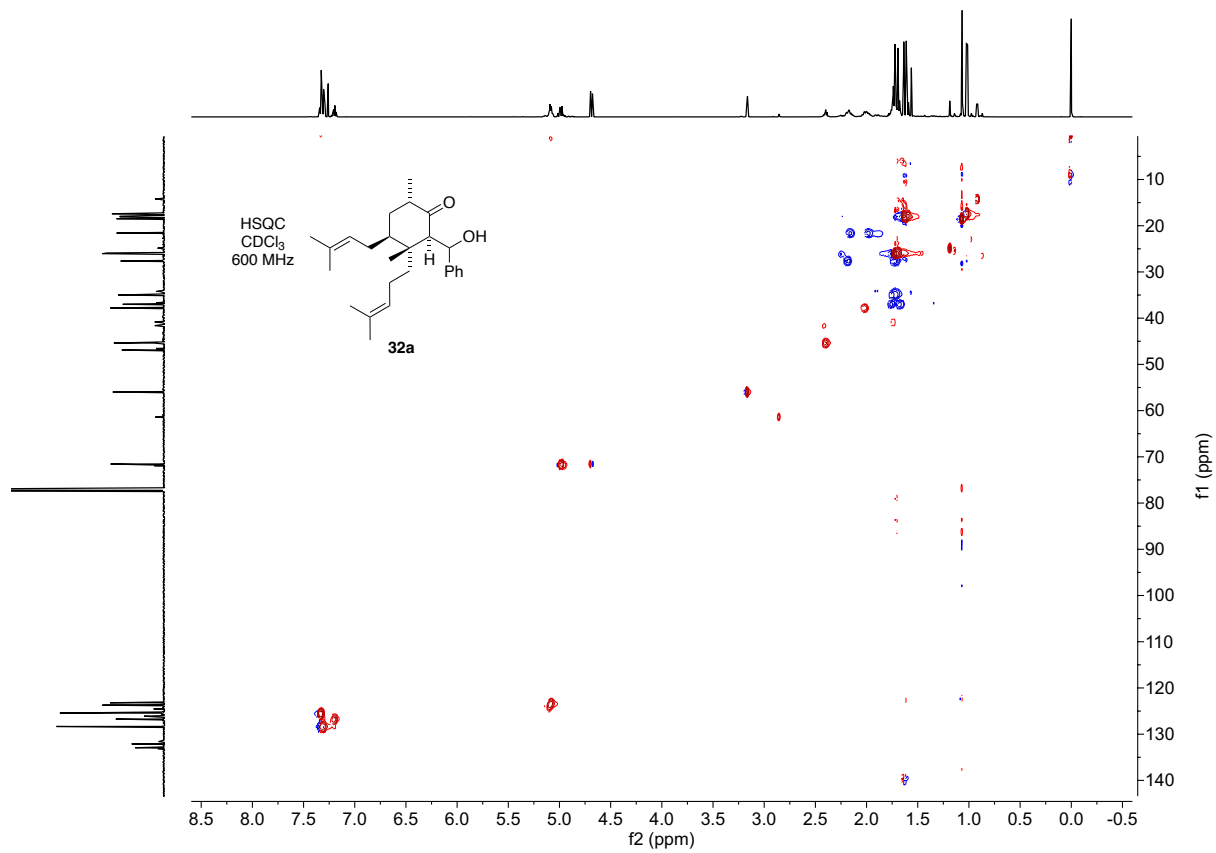

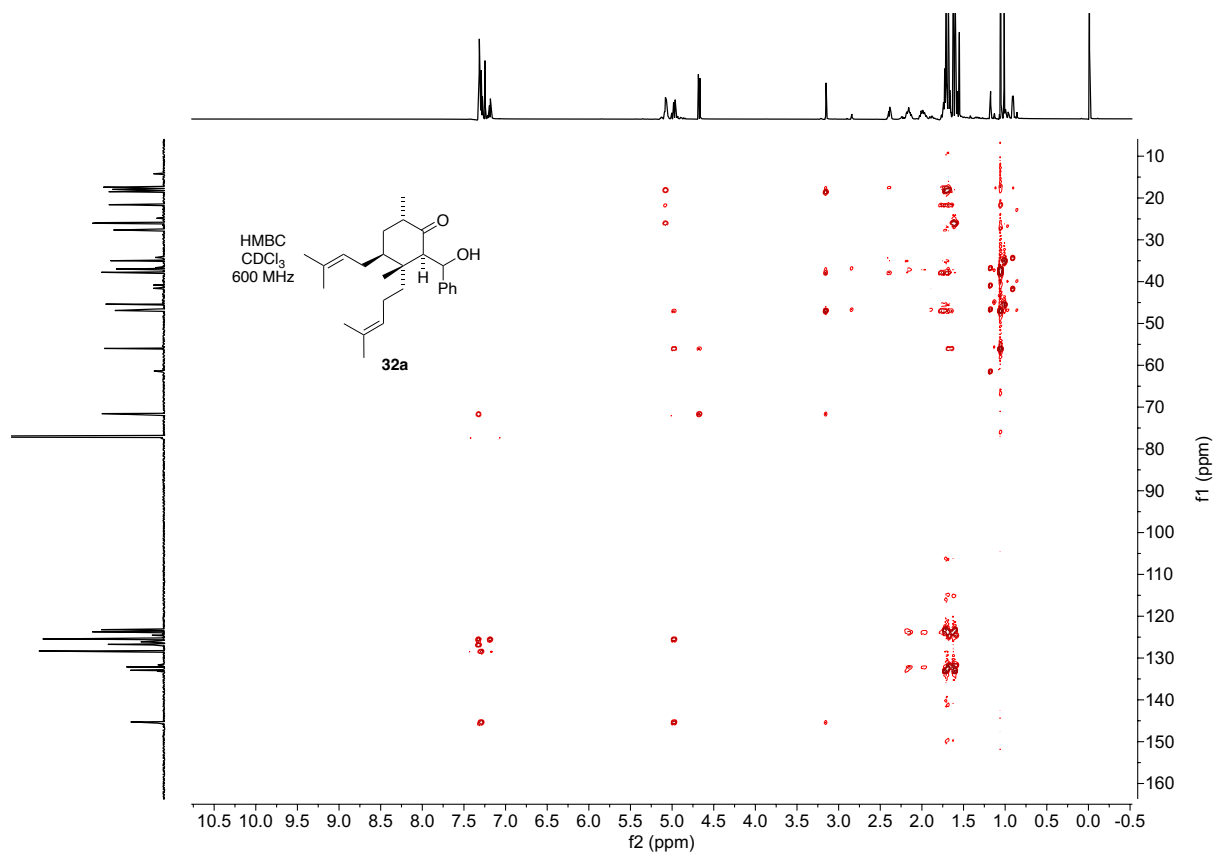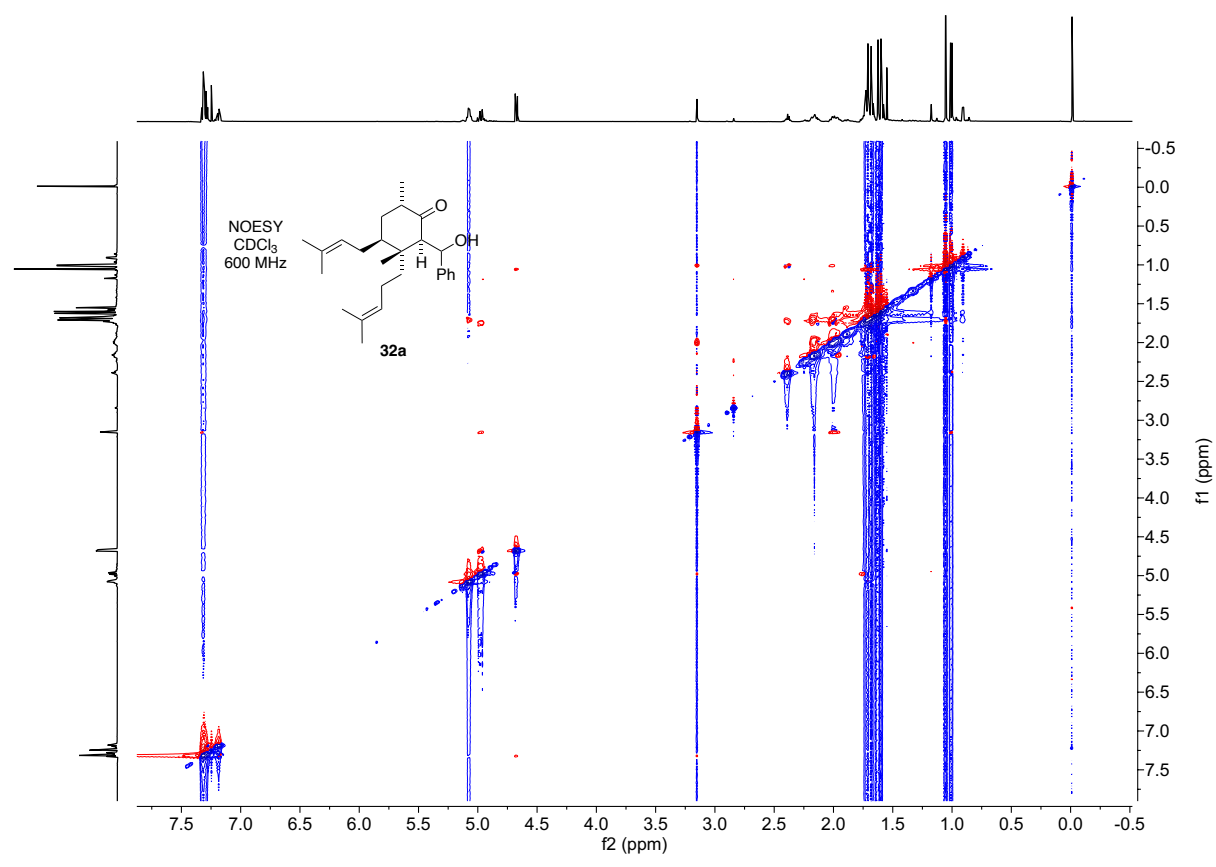

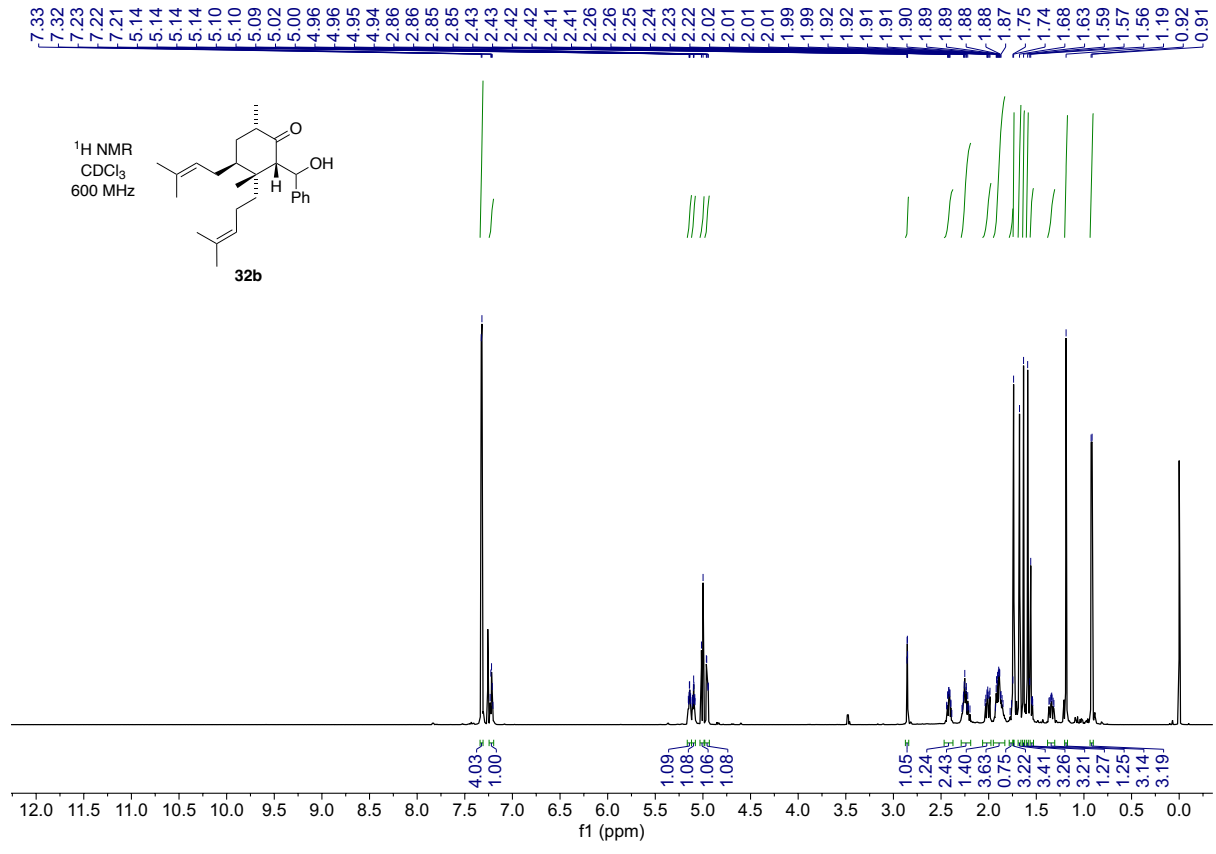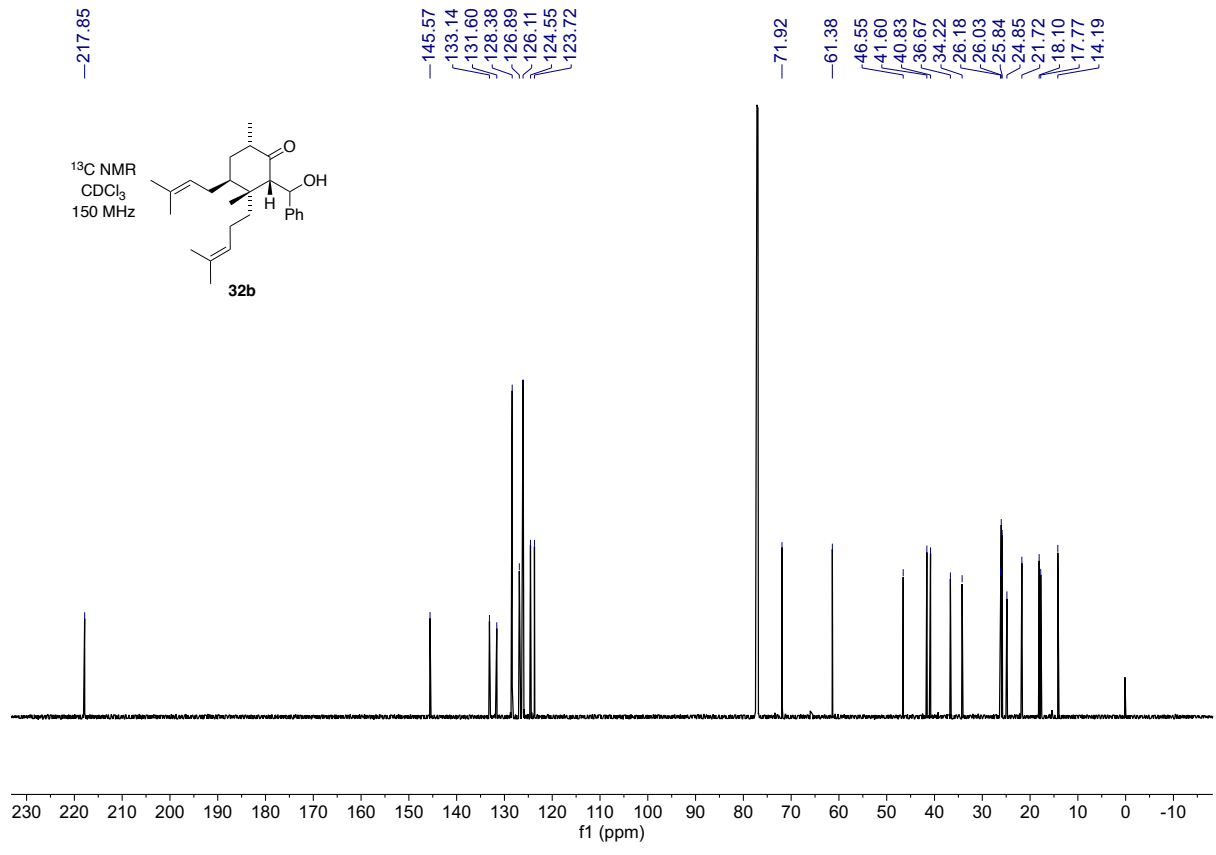

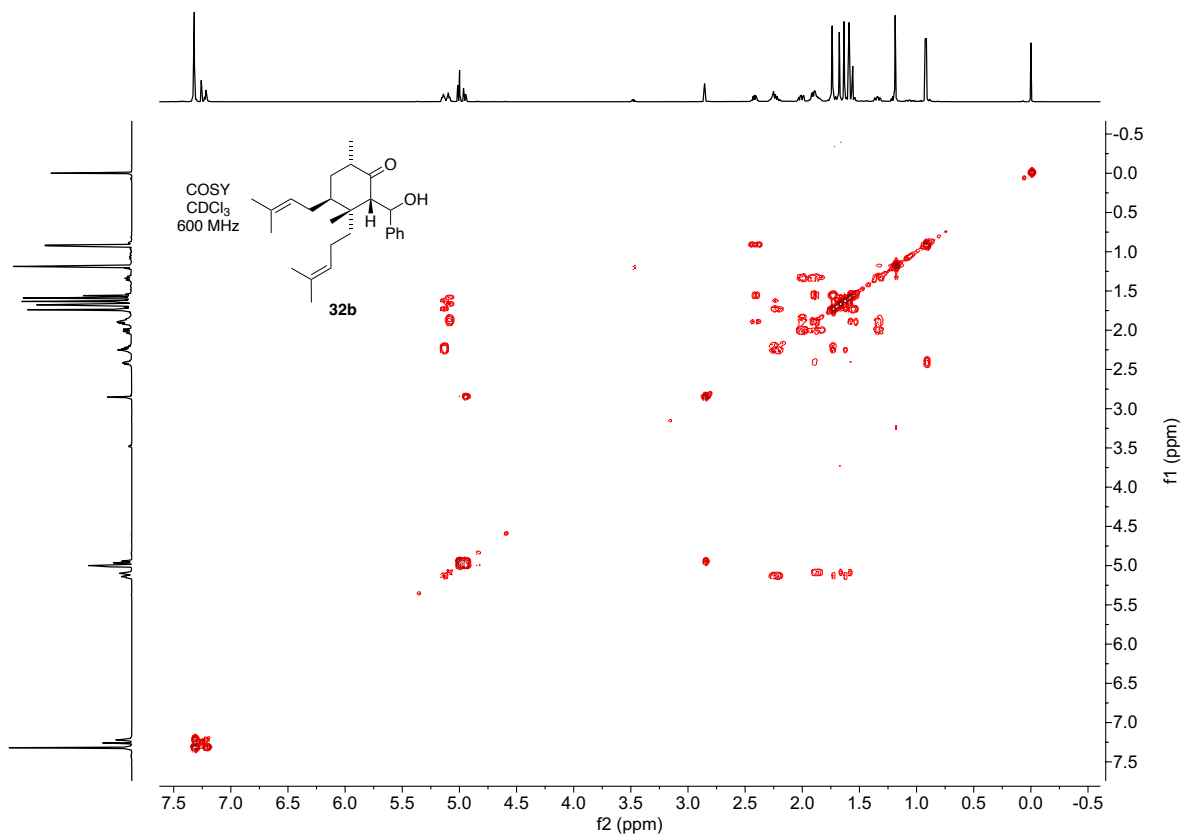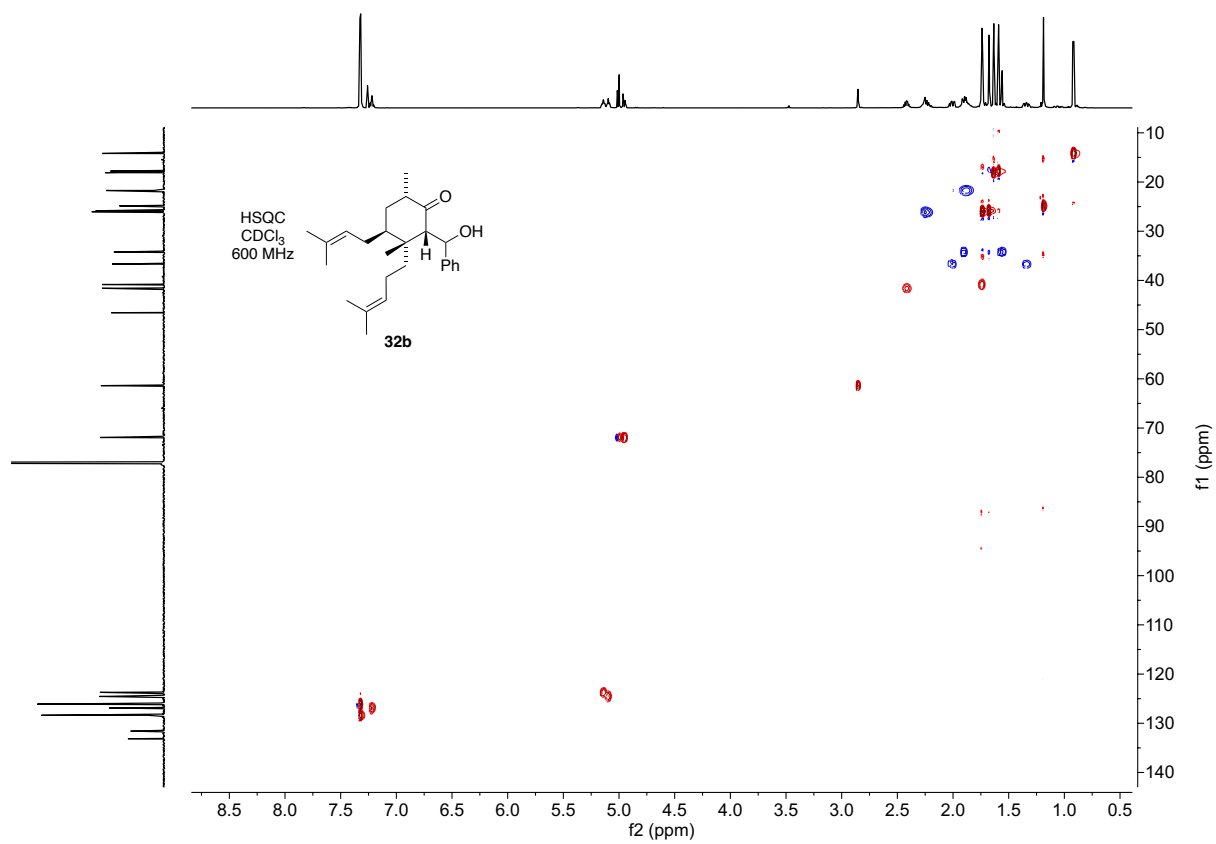



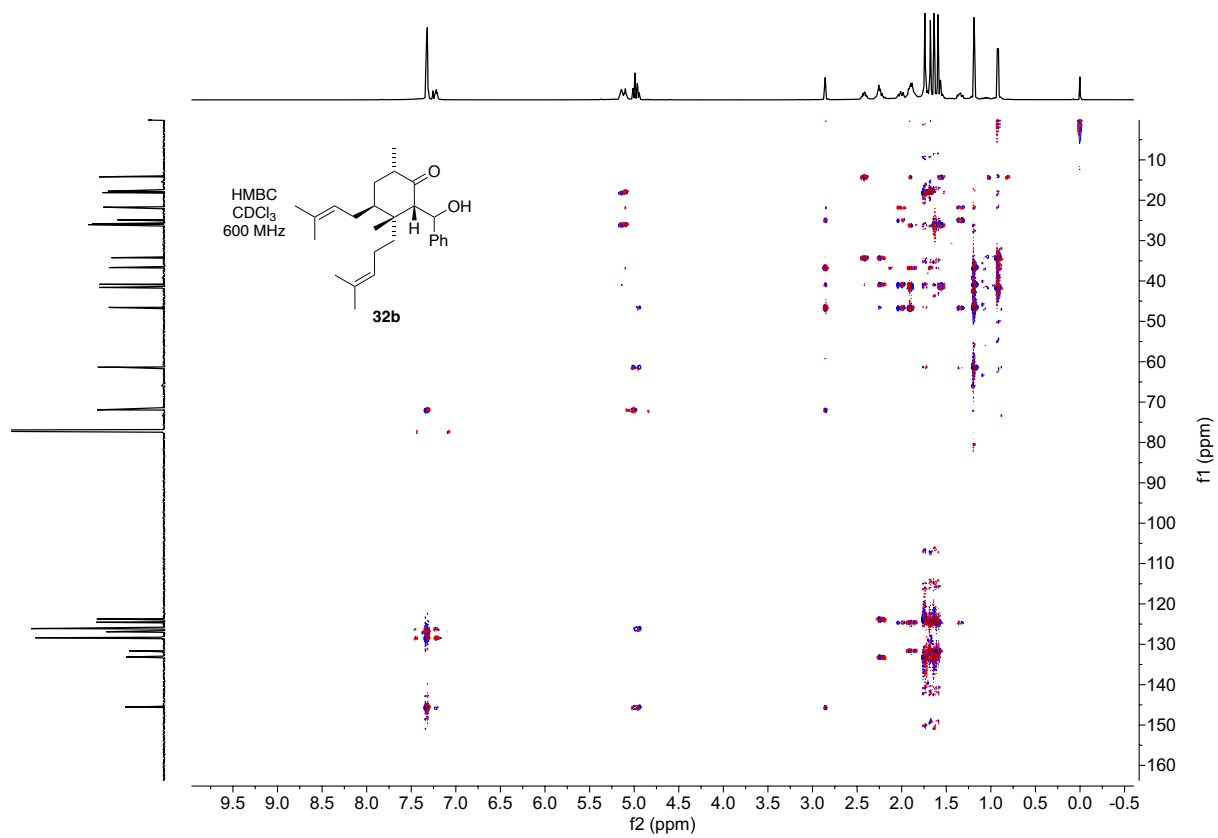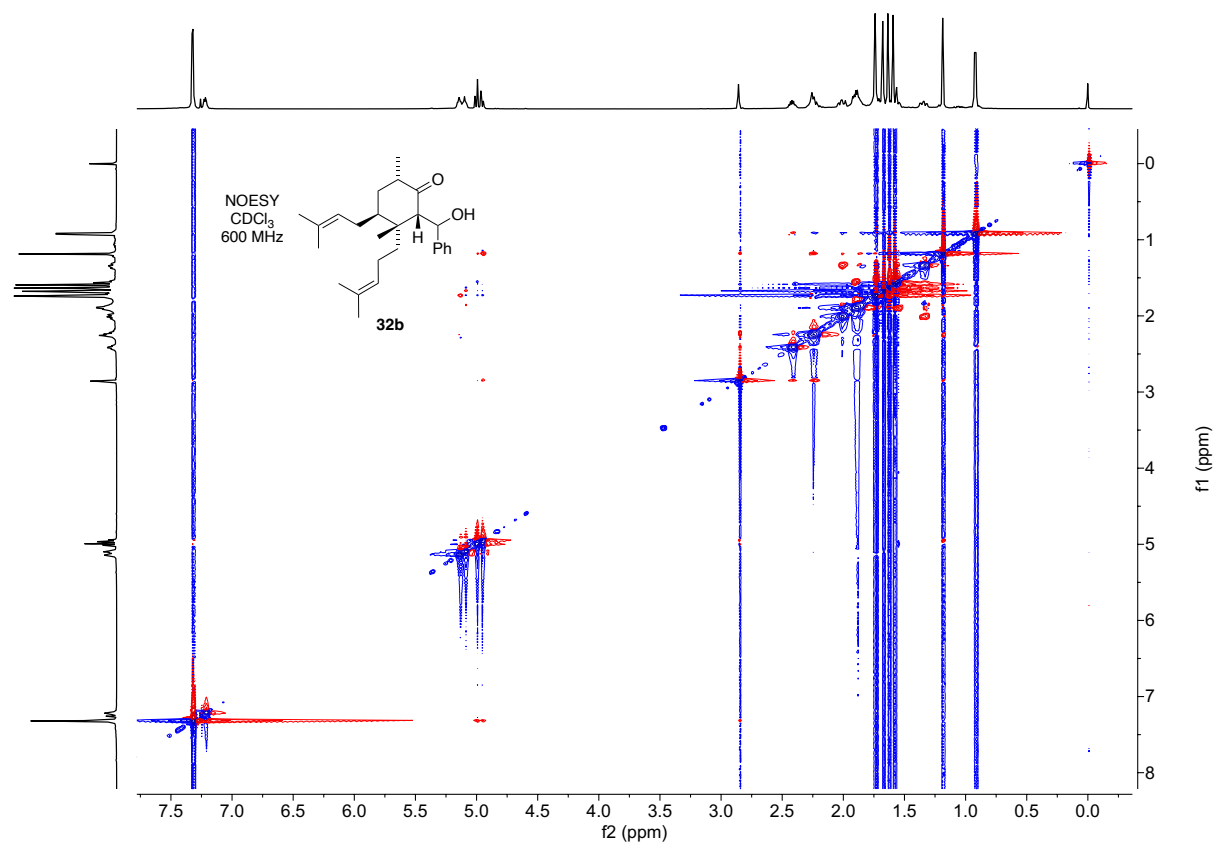

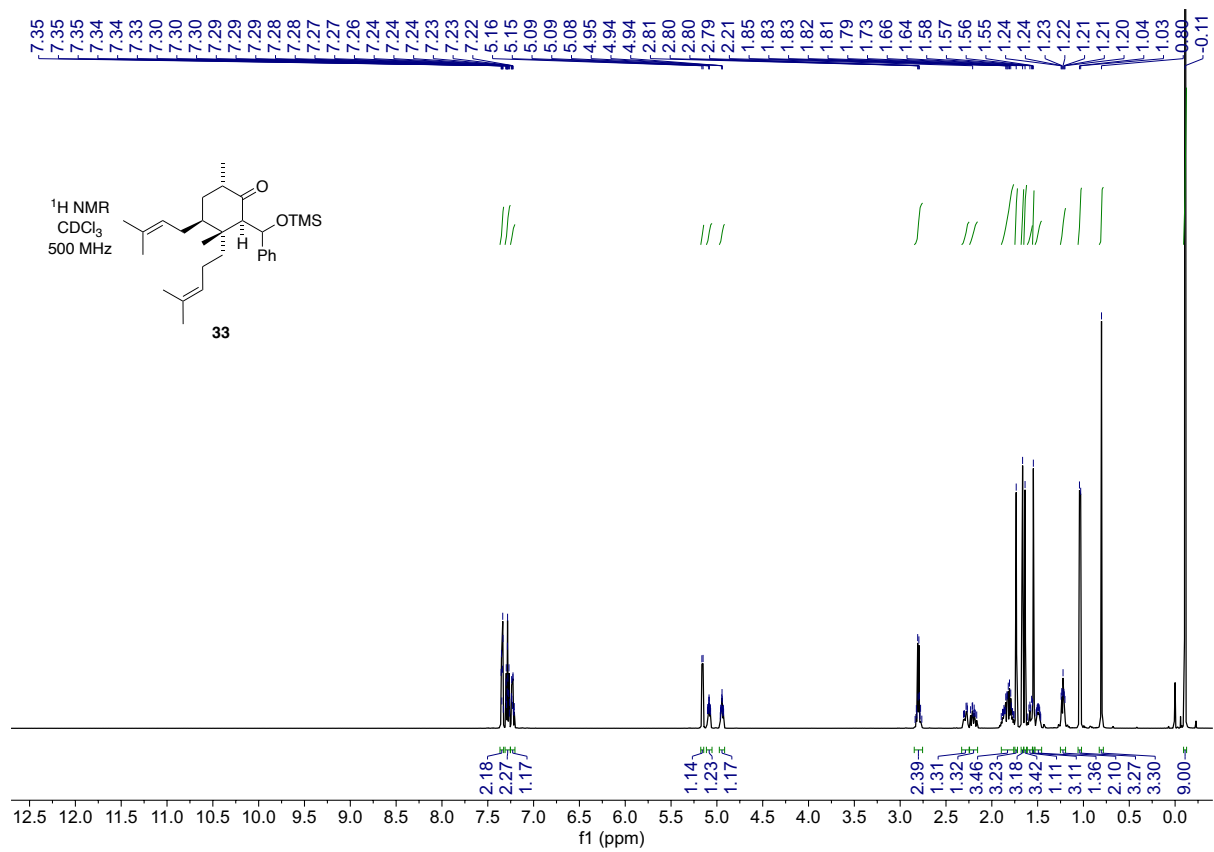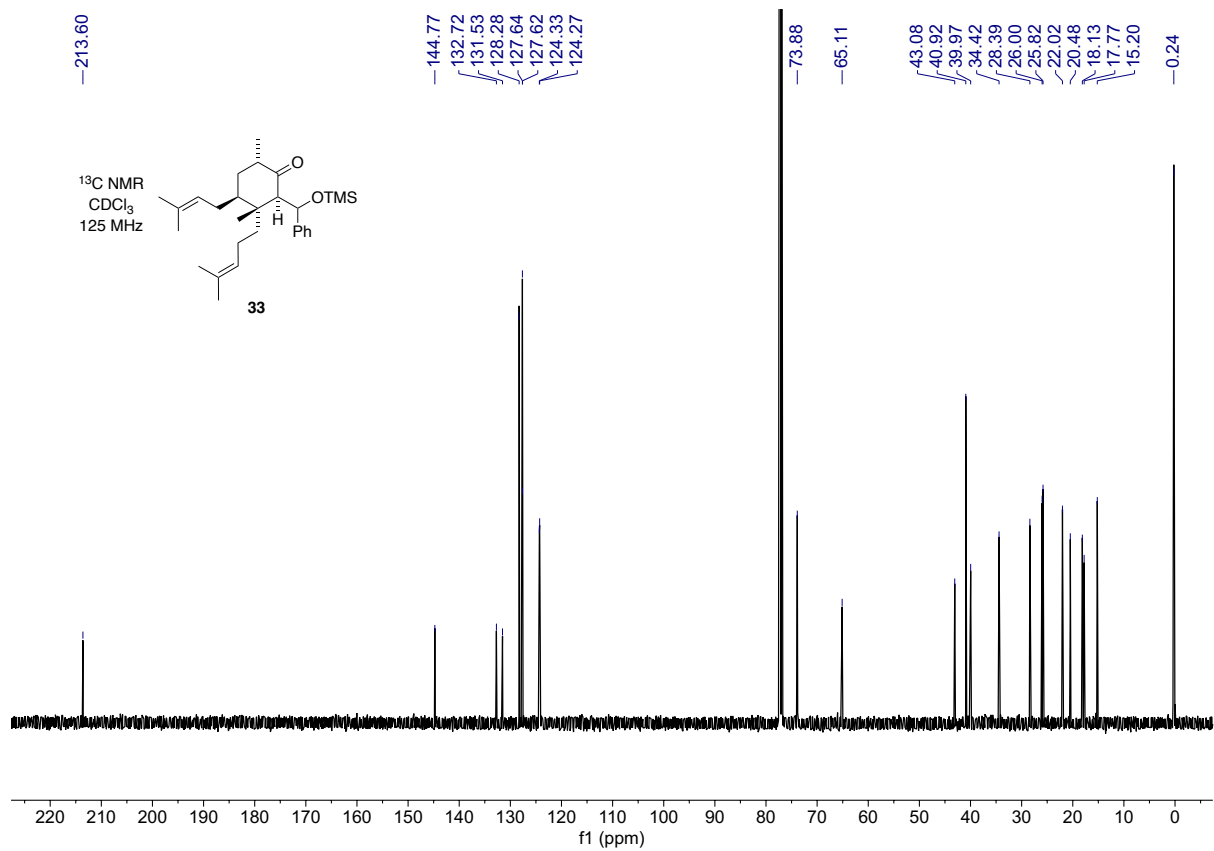

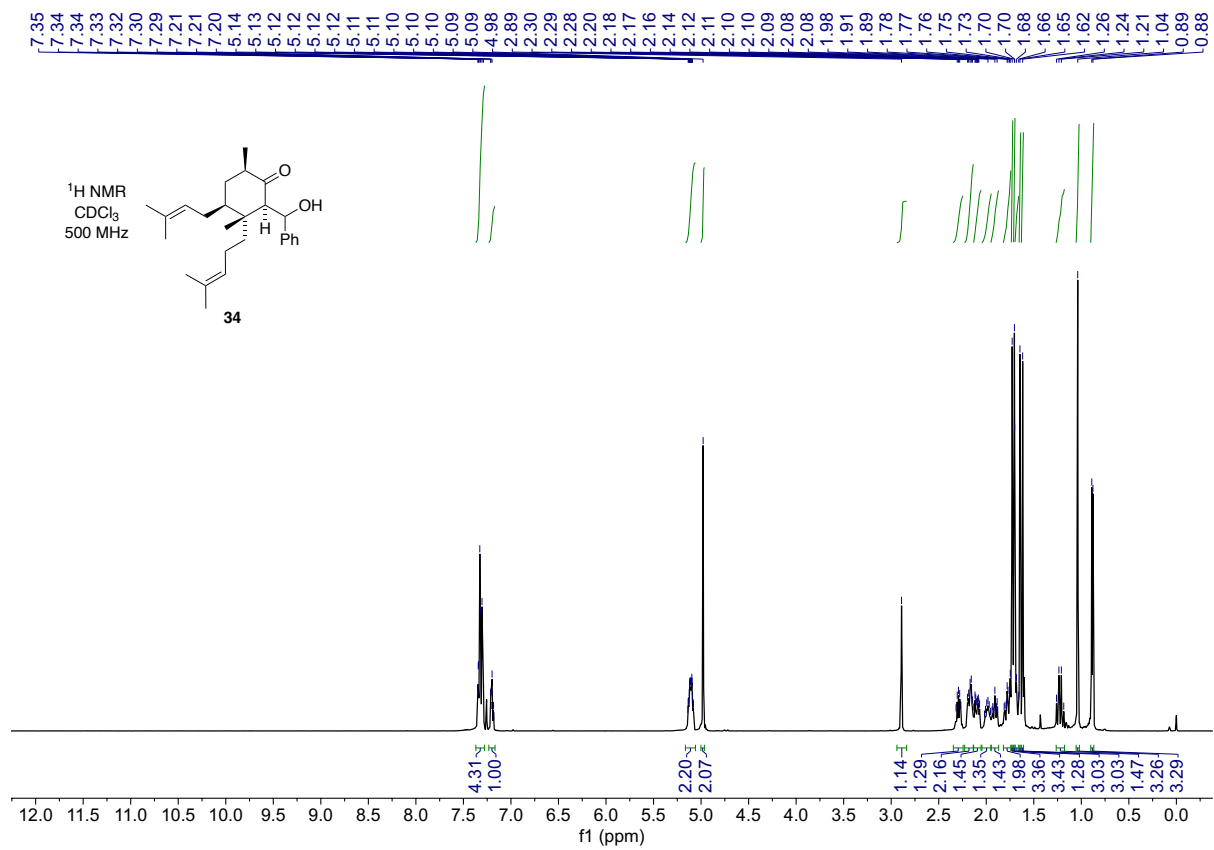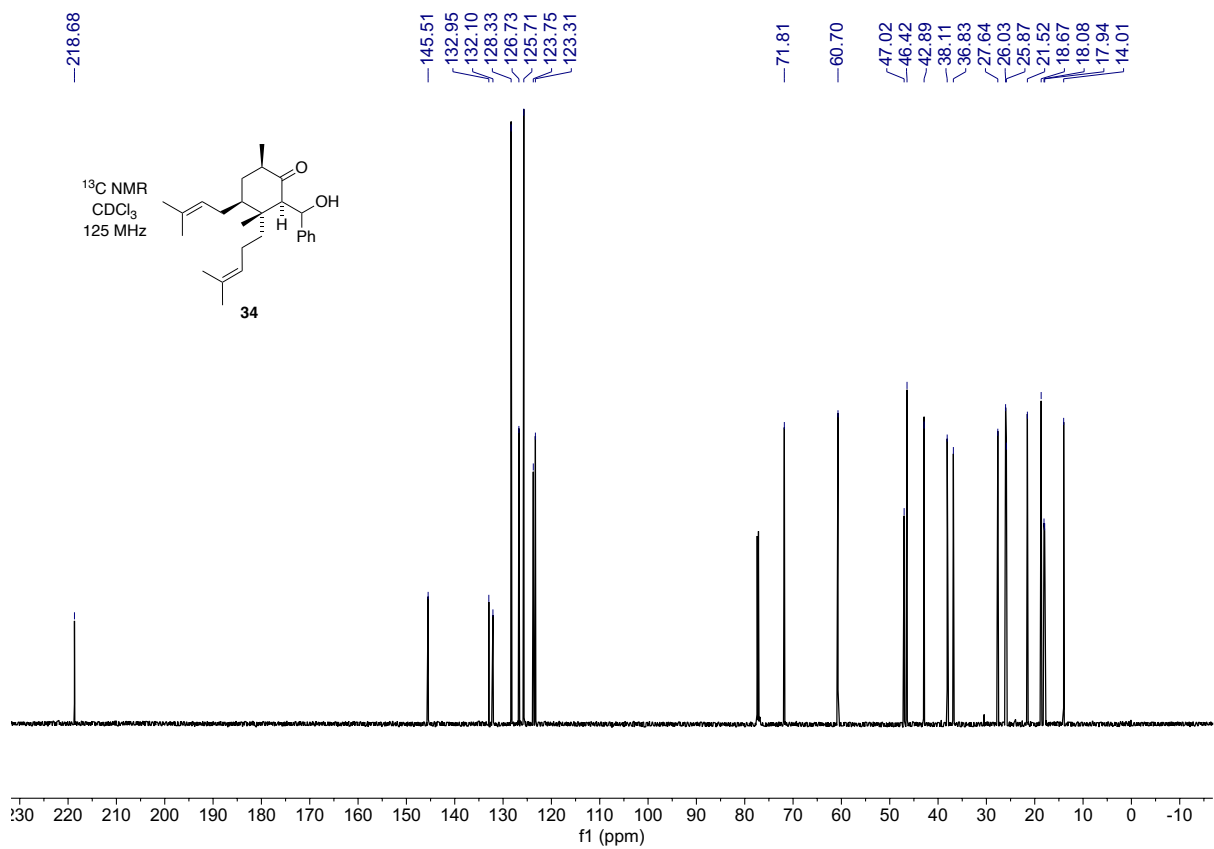

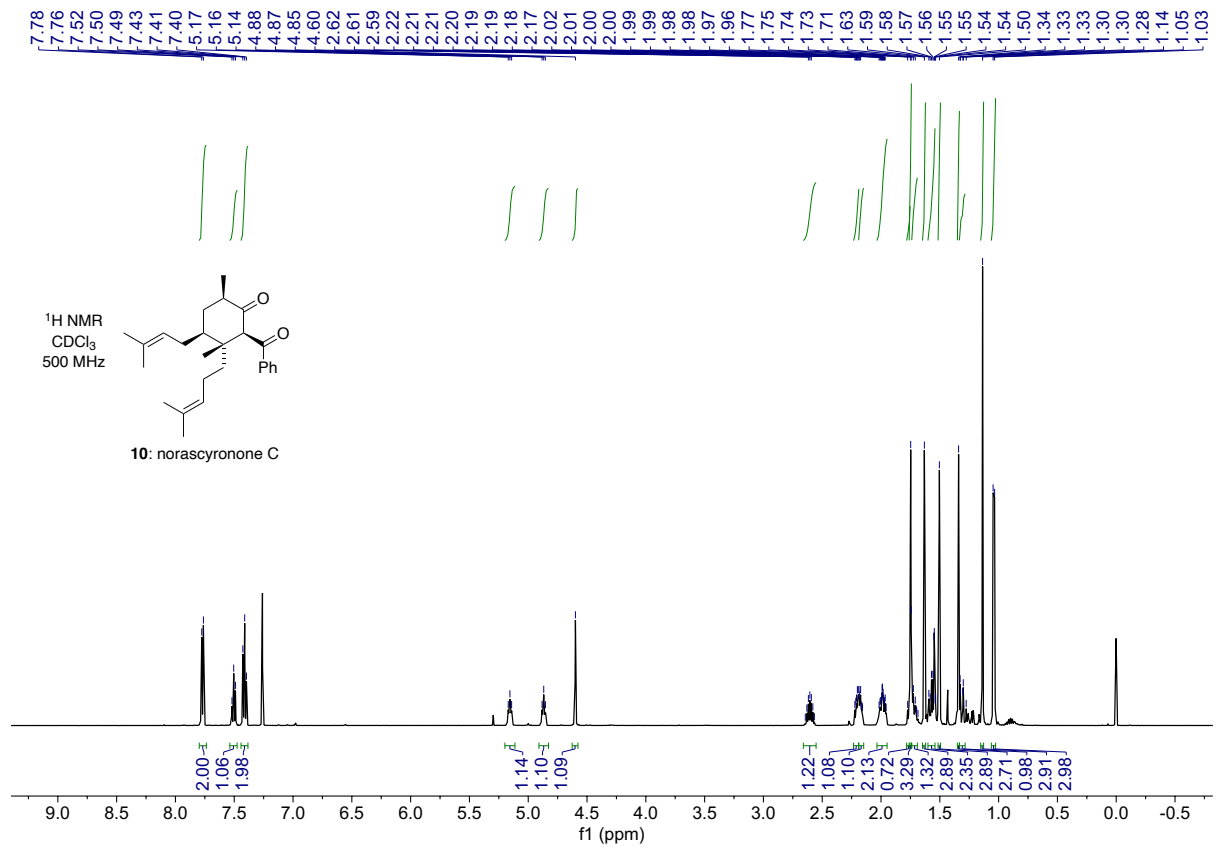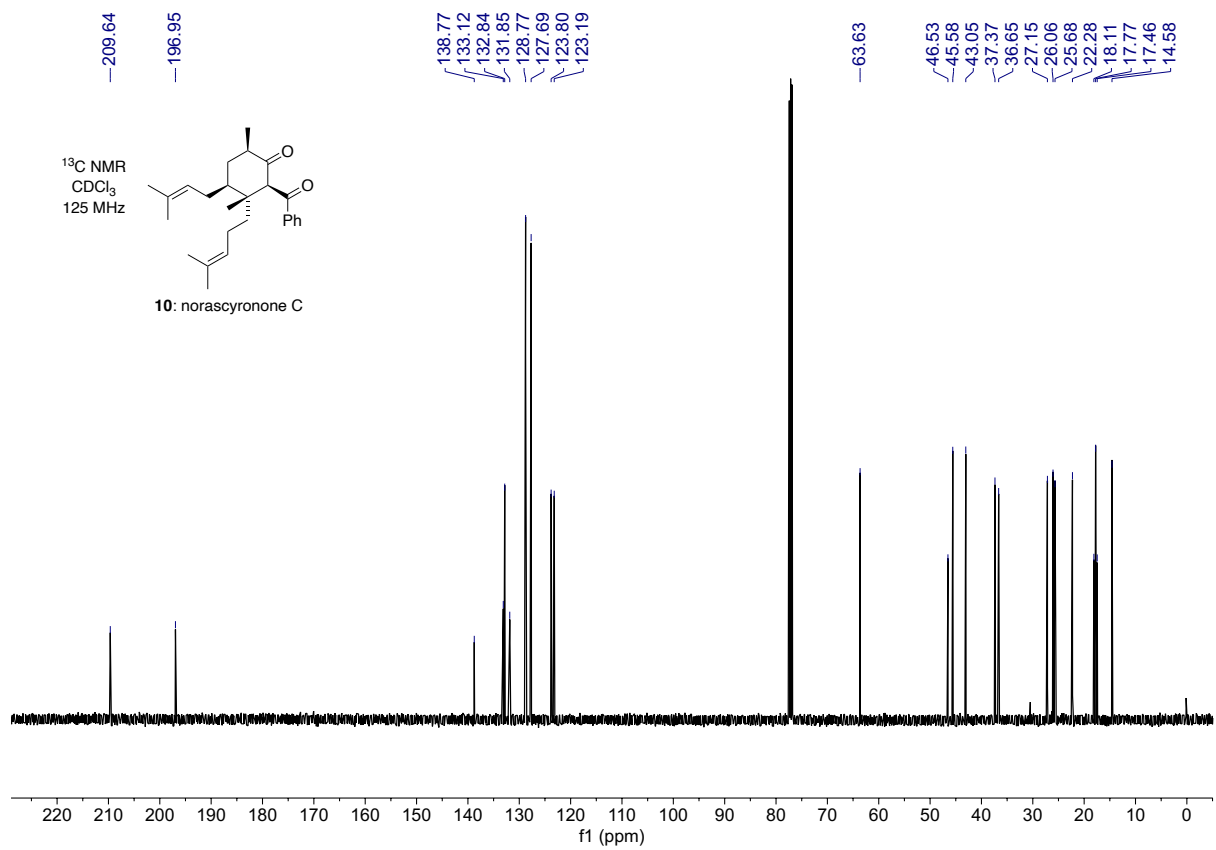

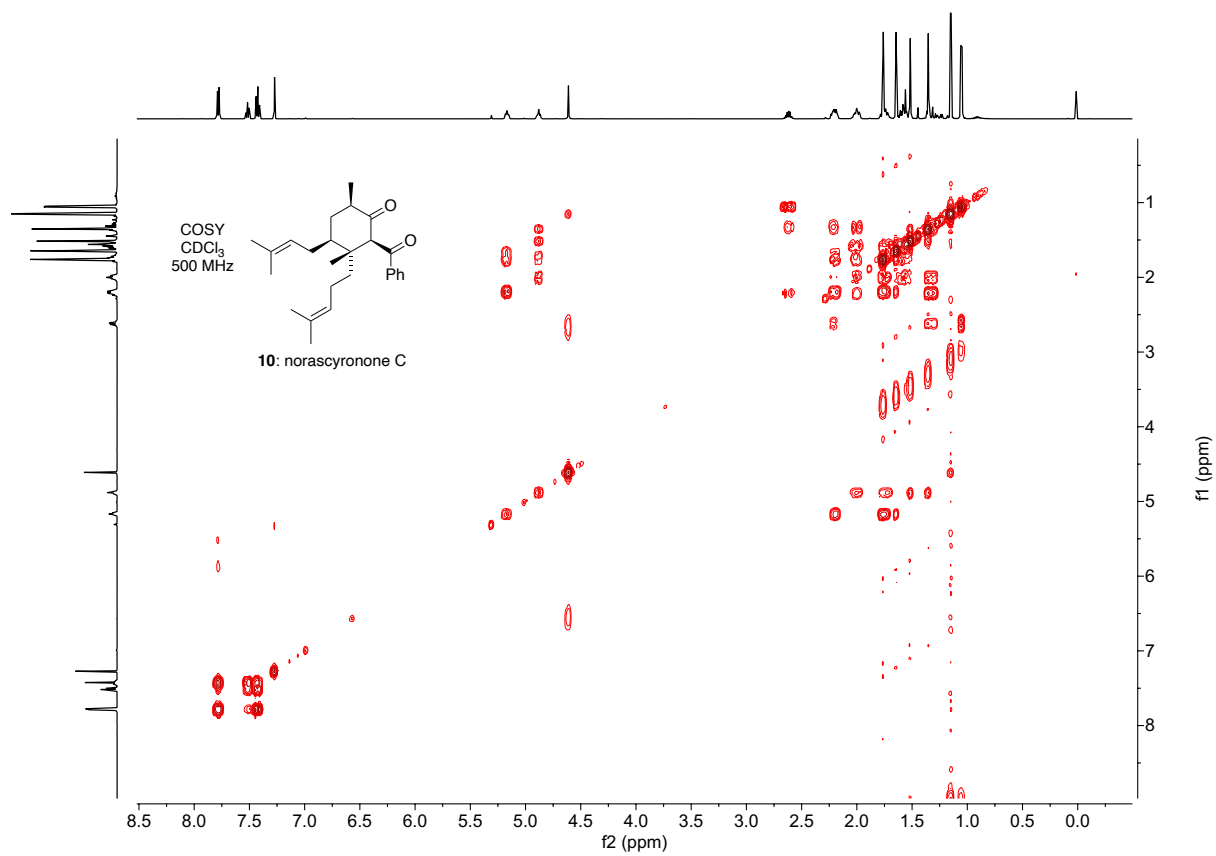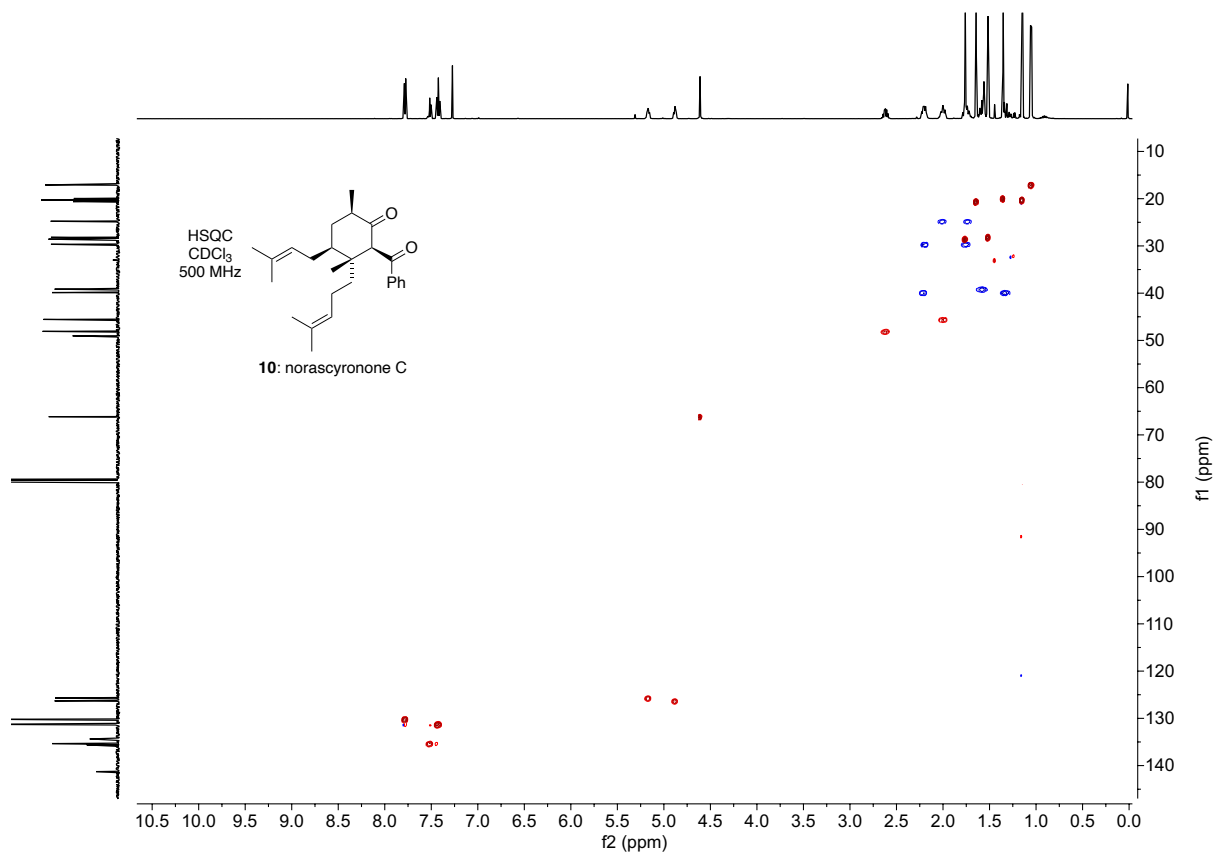

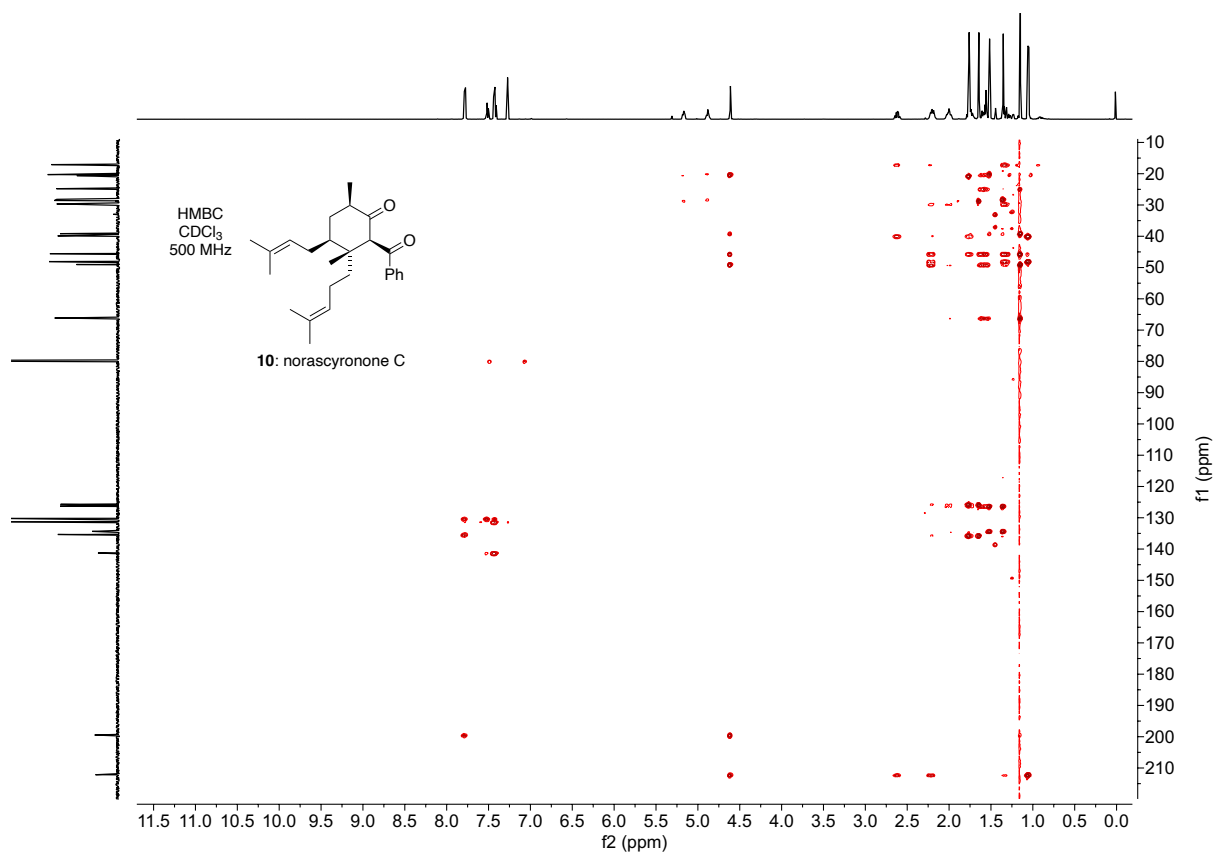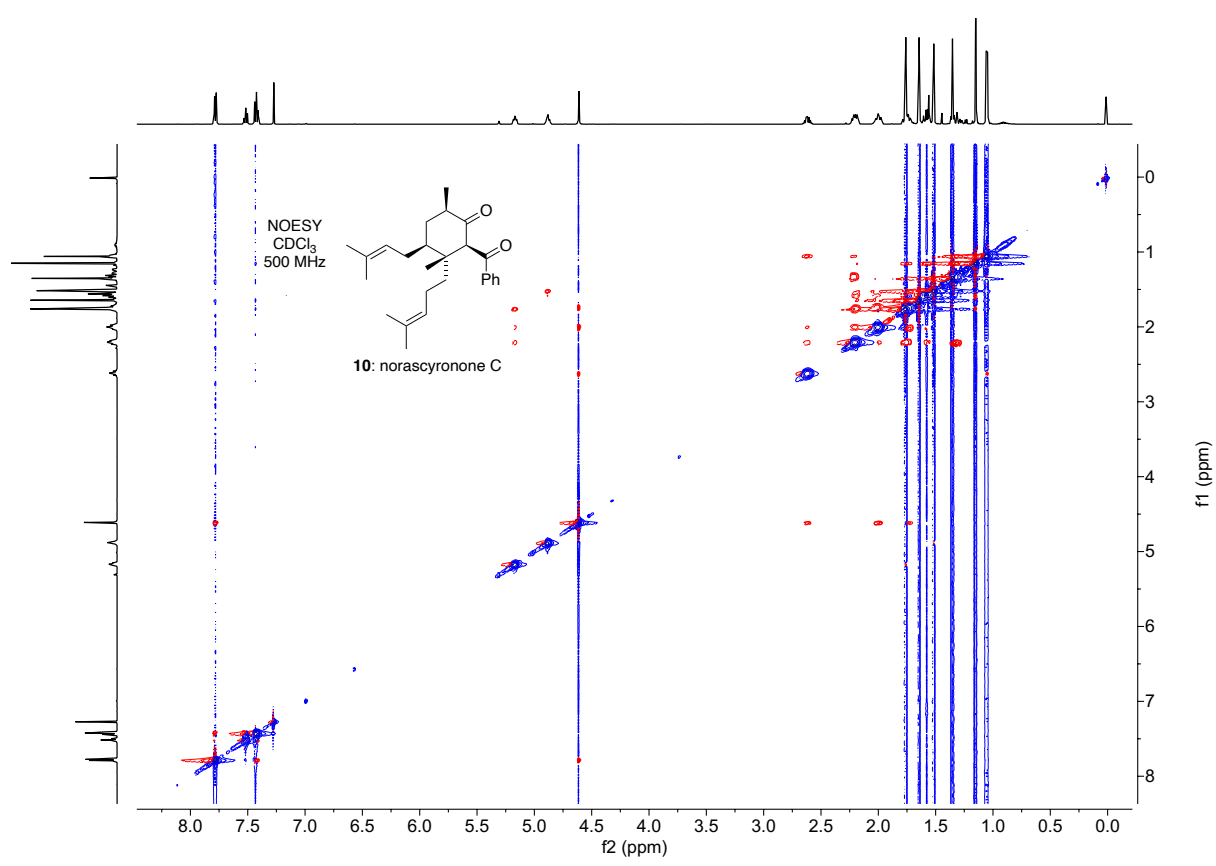

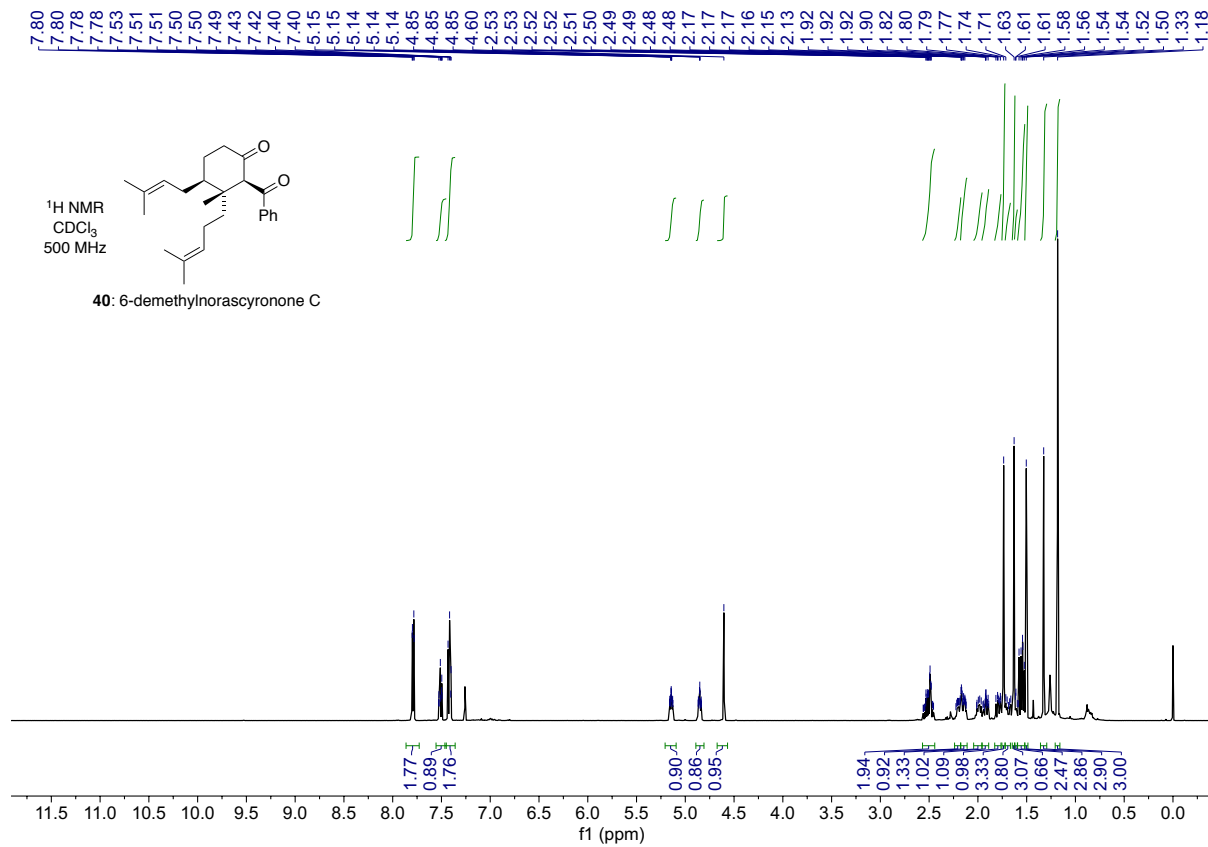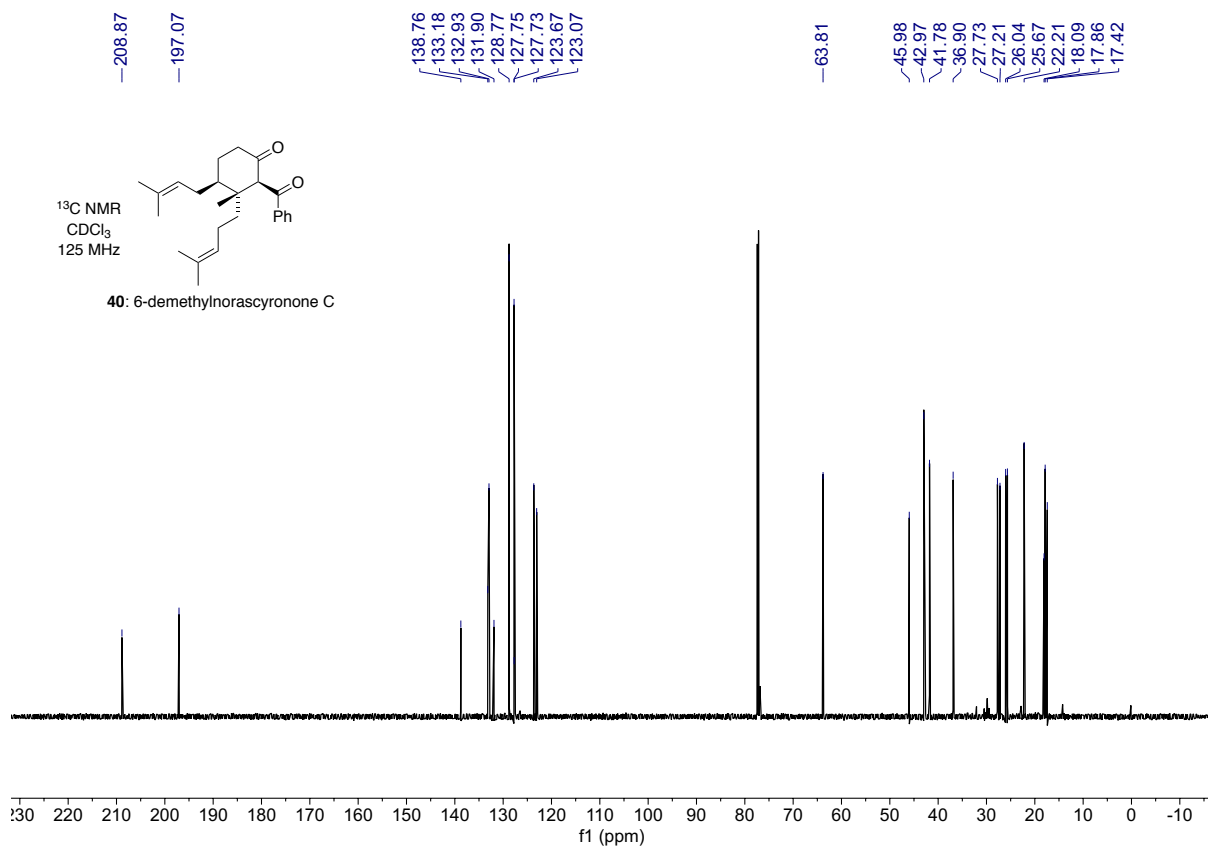

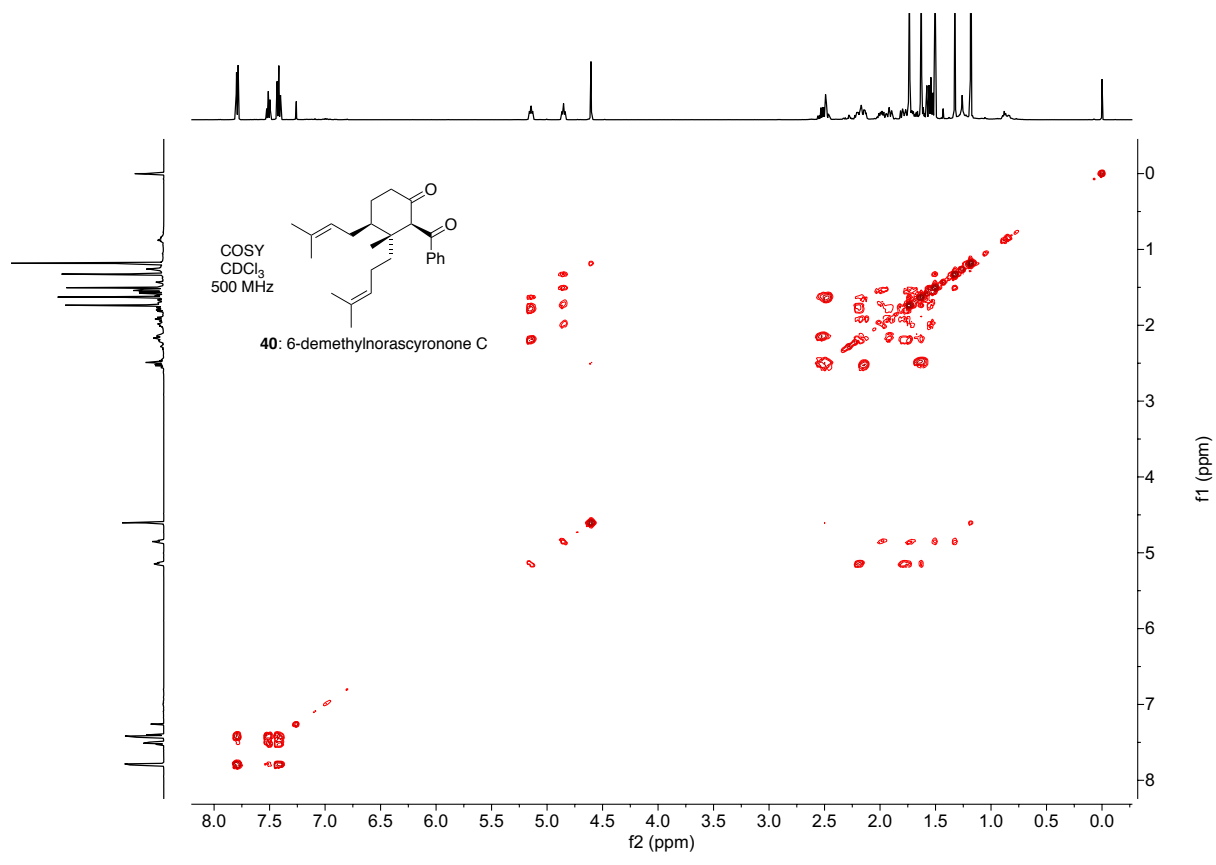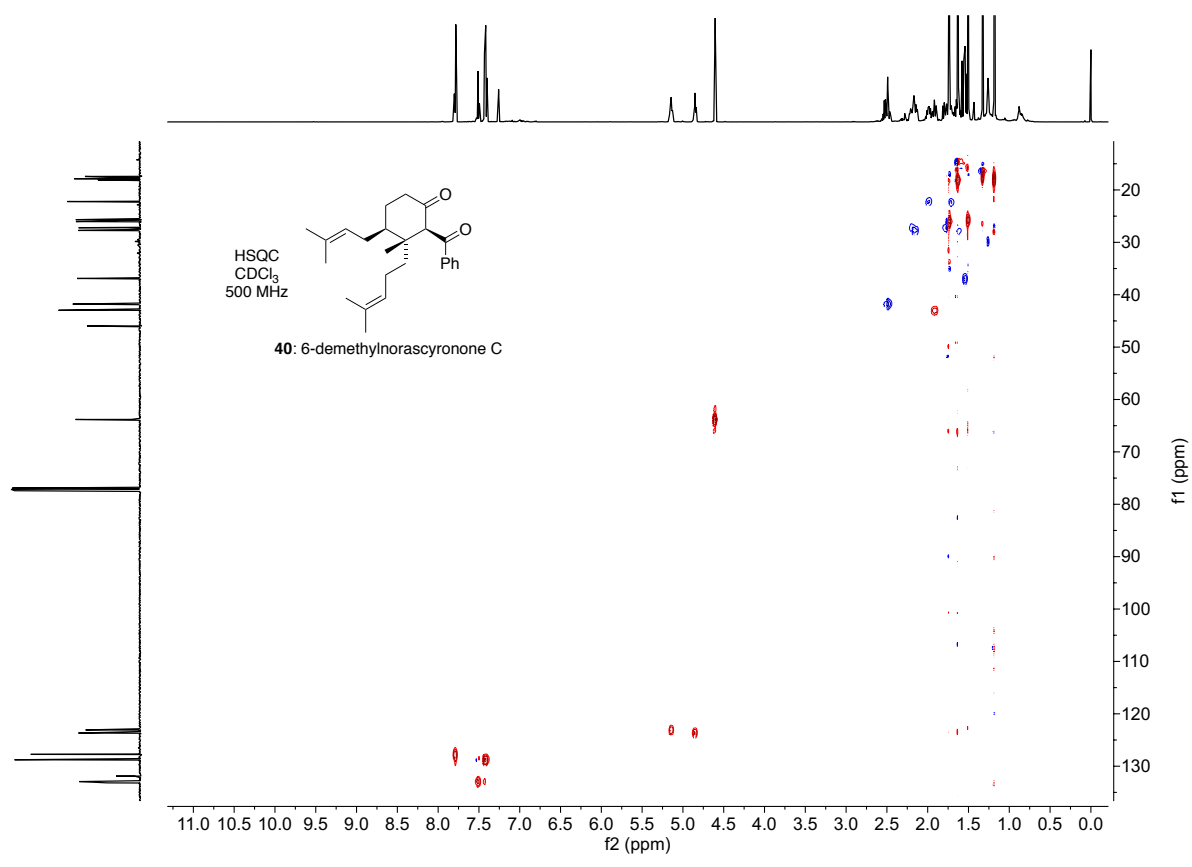



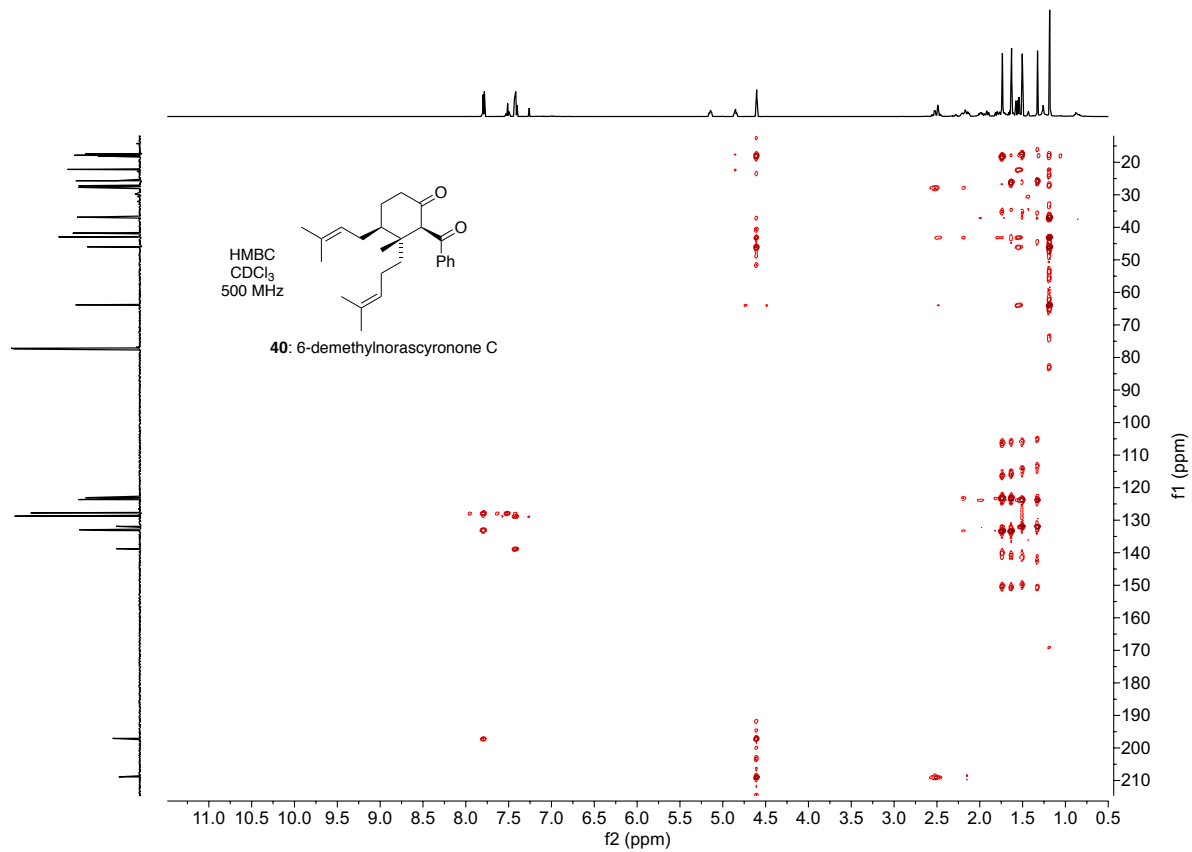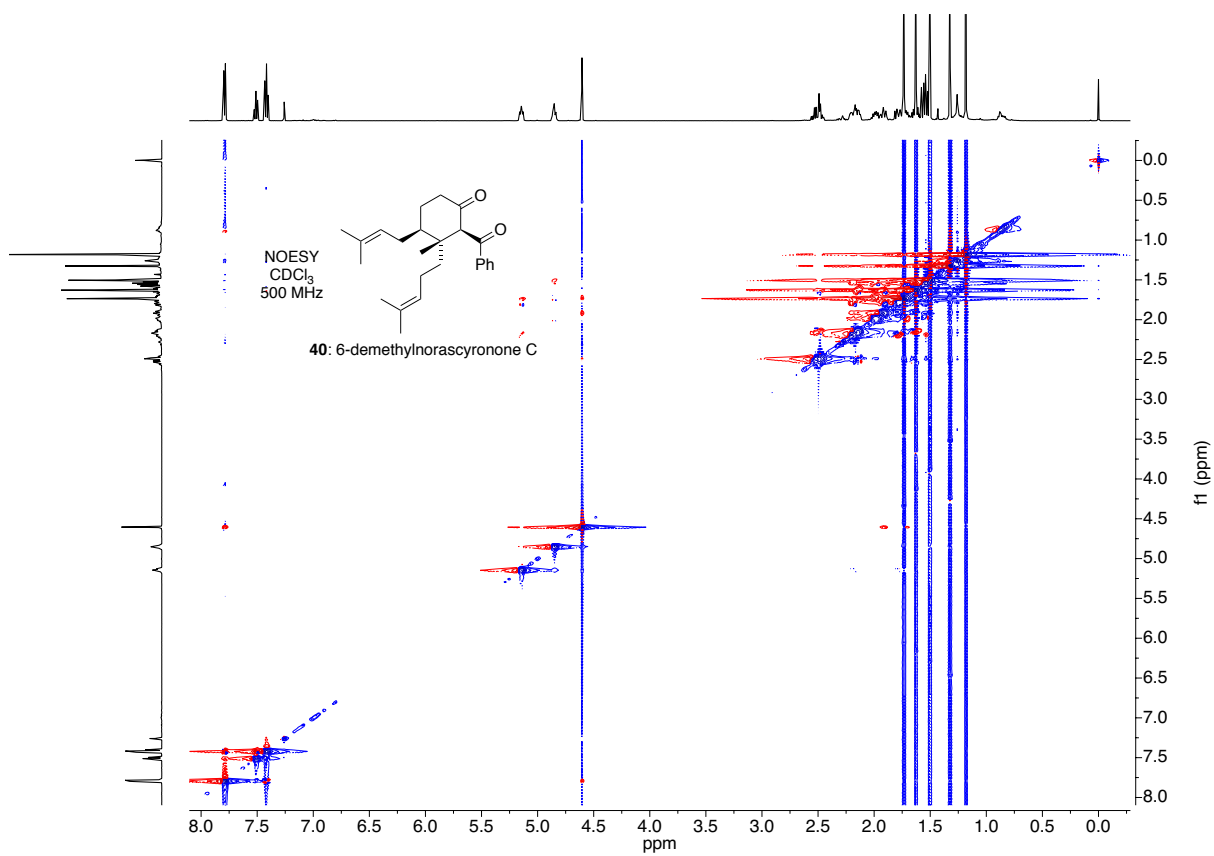

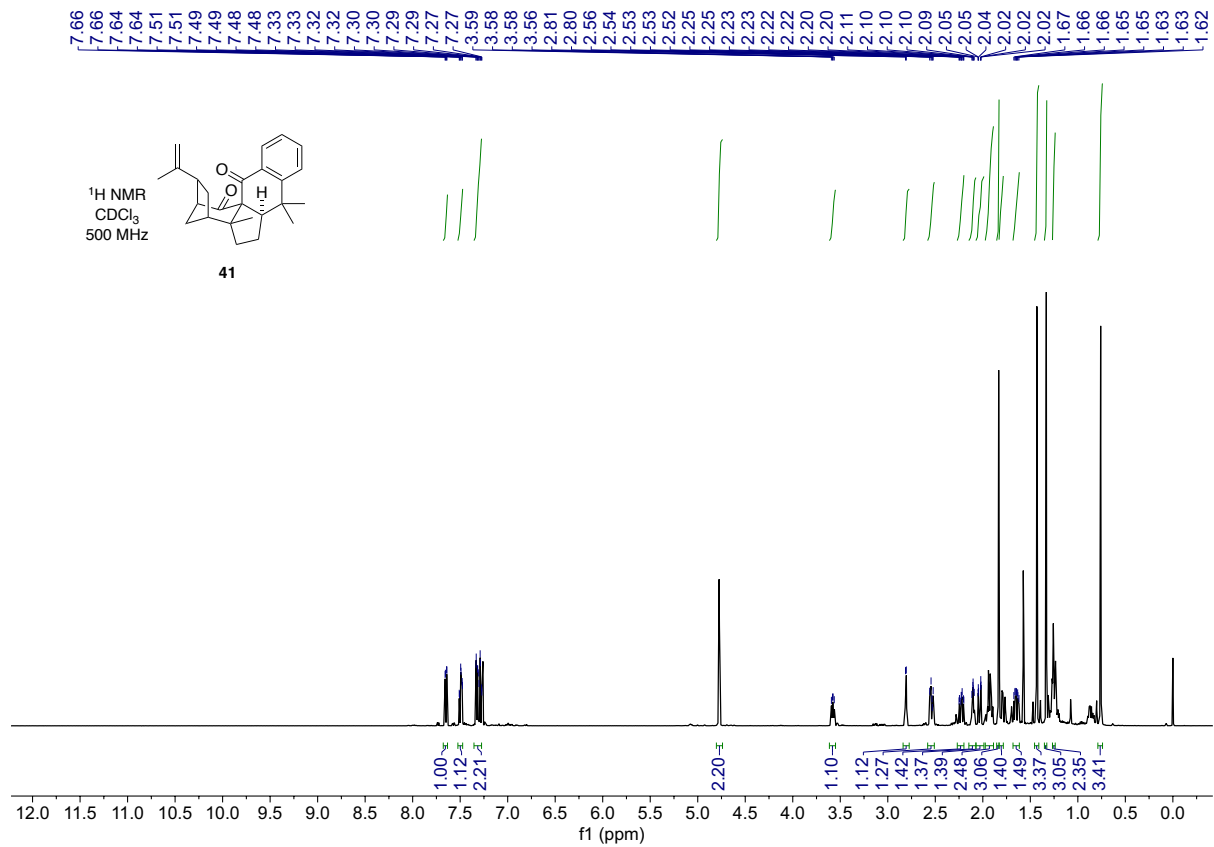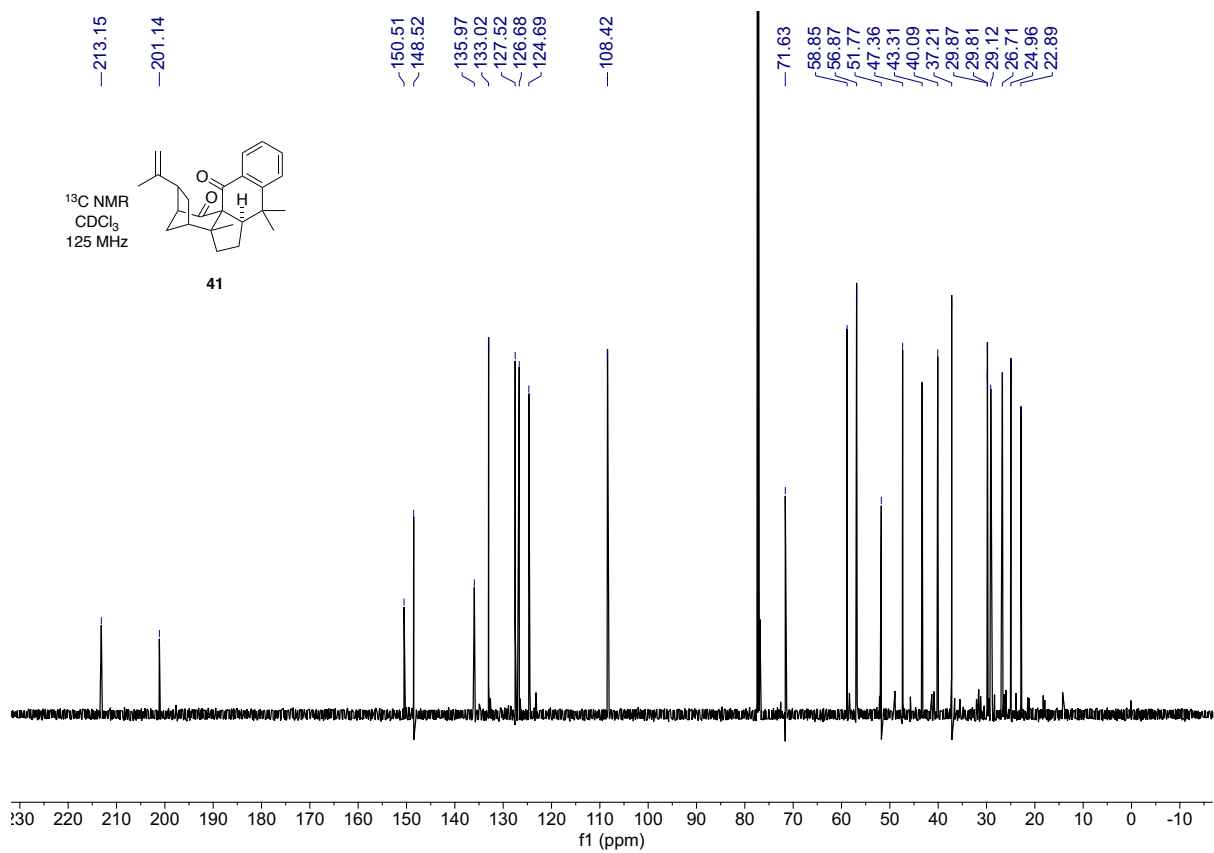

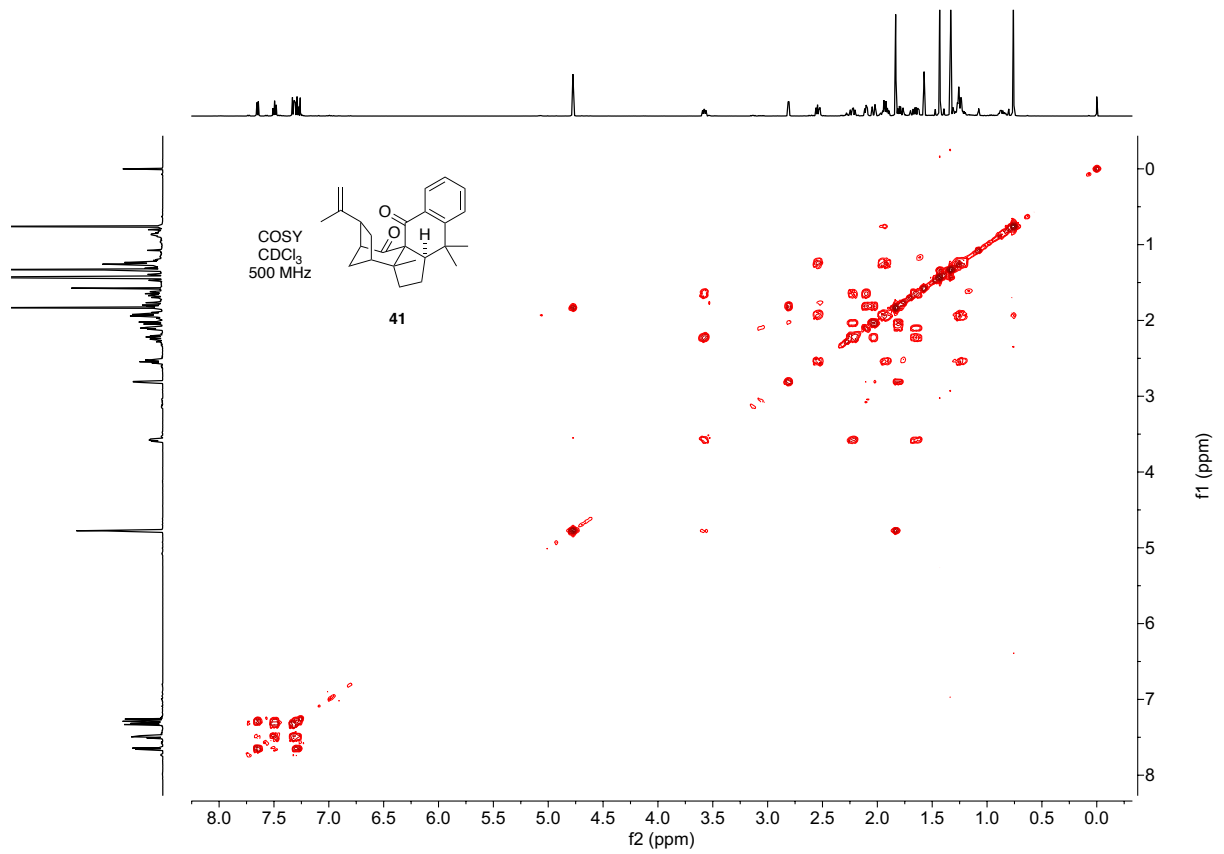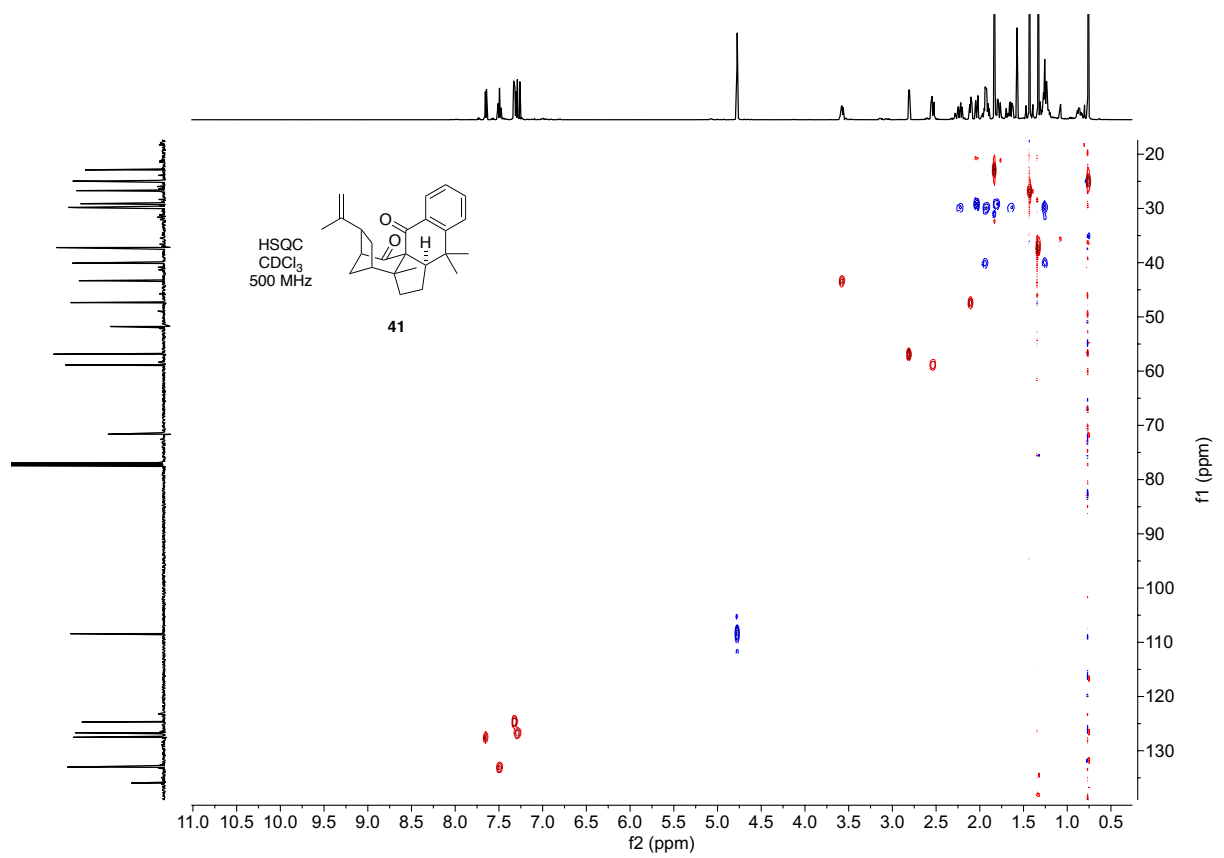

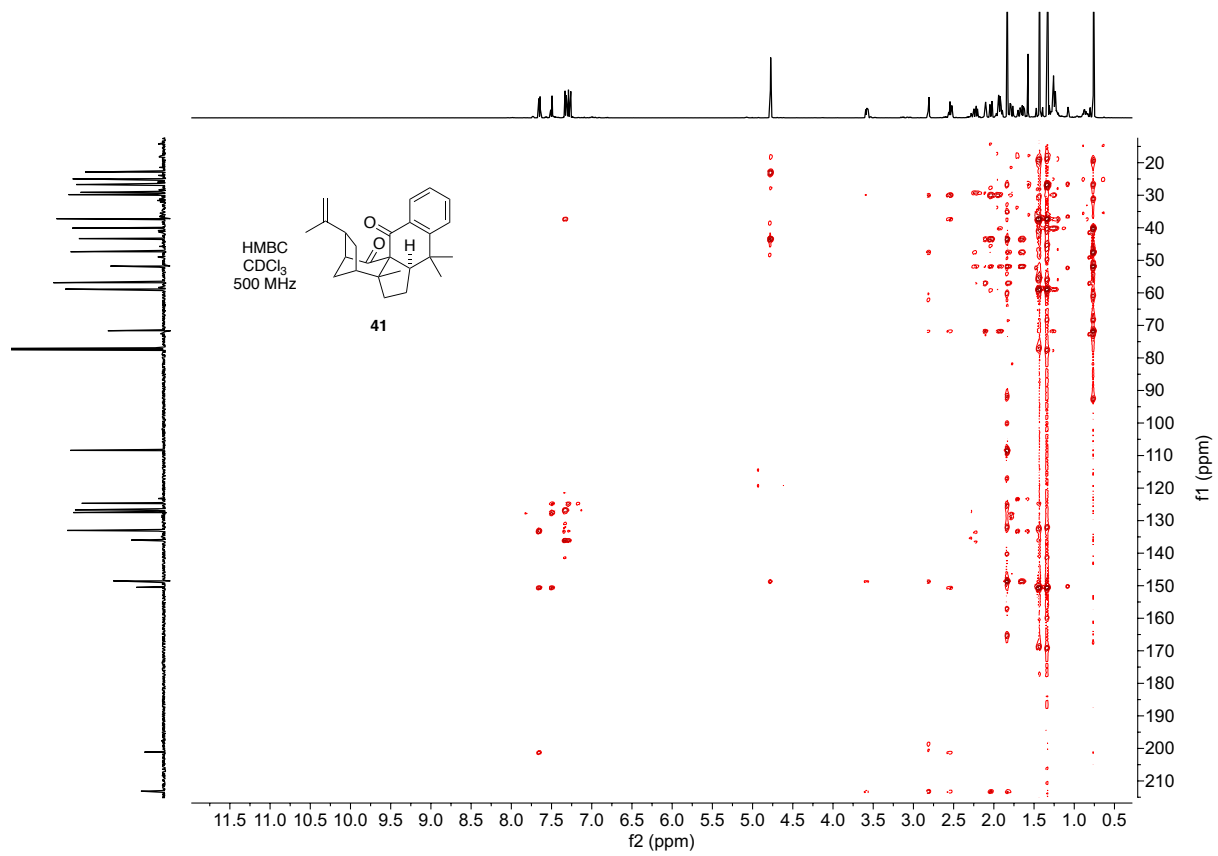

## 2. Tables of NMR data for natural products

Comparison of the  $^1\text{H}$  and  $^{13}\text{C}$  NMR spectra of natural<sup>1</sup> and synthetic hyperibrin A (**11**).

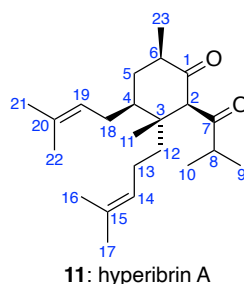

| Assignment | Natural $^1\text{H}$ NMR<br>$\text{CDCl}_3$ , 400 MHz | Synthetic $^1\text{H}$ NMR<br>$\text{CDCl}_3$ , 500 MHz | Natural $^{13}\text{C}$ NMR<br>$\text{CDCl}_3$ , 125 MHz | Synthetic $^{13}\text{C}$ NMR<br>$\text{CDCl}_3$ , 125 MHz |
|------------|-------------------------------------------------------|---------------------------------------------------------|----------------------------------------------------------|------------------------------------------------------------|
| <b>1</b>   |                                                       |                                                         | 210.6                                                    | 210.6                                                      |
| <b>2</b>   | 3.85 (s)                                              | 3.85 (s)                                                | 66.7                                                     | 66.7                                                       |
| <b>3</b>   |                                                       |                                                         | 45.5                                                     | 45.5                                                       |
| <b>4</b>   | 1.84 (m)                                              | 1.86 – 1.75 (m)                                         | 42.4                                                     | 42.5                                                       |
| <b>5</b>   | 2.13 (m)<br>1.68 (m)                                  | 2.13 – 2.01 (m)<br>1.71 – 1.68 (m)                      | 36.9                                                     | 37.0                                                       |
| <b>6</b>   | 2.45 (m)                                              | 2.50 – 2.43 (m)                                         | 42.7                                                     | 42.7                                                       |
| <b>7</b>   |                                                       |                                                         | 211.0                                                    | 211.0                                                      |
| <b>8</b>   | 2.47 (m)                                              | 2.50 – 2.43 (m)                                         | 45.5                                                     |                                                            |
| <b>9</b>   | 1.06 (d, $J = 8.4$ )                                  | 1.04 (d, $J = 8.0$ Hz)                                  | 18.5                                                     | 18.5                                                       |
| <b>10</b>  | 1.08 (d, $J = 8.4$ )                                  | 1.06 (d, $J = 8.0$ Hz)                                  | 17.9                                                     | 18.0                                                       |
| <b>11</b>  | 1.00 (s)                                              | 1.00 (s)                                                | 17.3                                                     | 17.3                                                       |
| <b>12</b>  | 1.50 (m)<br>1.25 (m)                                  | 1.50 – 1.46 (m)<br>1.26 – 1.18 (m)                      | 36.6                                                     | 36.6                                                       |
| <b>13</b>  | 2.07 (m)<br>1.49 (m)                                  | 2.13 – 2.01 (m)<br>1.50 – 1.46 (m)                      | 21.9                                                     | 21.9                                                       |
| <b>14</b>  | 4.98 (t, $J = 5.6$ )                                  | 4.98 (t, $J = 6.7$ Hz)                                  | 123.6                                                    | 123.7                                                      |
| <b>15</b>  |                                                       |                                                         | 131.6                                                    | 131.7                                                      |
| <b>16</b>  | 1.66 (s)                                              | 1.66 (s)                                                | 17.6                                                     | 17.7                                                       |
| <b>17</b>  | 1.58 (s)                                              | 1.58 (s)                                                | 25.6                                                     | 25.7                                                       |
| <b>18</b>  | 2.12 (m)<br>1.71 (m)                                  | 2.13 – 2.01 (m)<br>1.71 – 1.68 (m)                      | 26.8                                                     | 26.8                                                       |
| <b>19</b>  | 5.12 (t, $J = 5.6$ )                                  | 5.12 (t, $J = 7.0$ Hz)                                  | 122.9                                                    | 123.0                                                      |
| <b>20</b>  |                                                       |                                                         | 132.9                                                    | 132.9                                                      |
| <b>21</b>  | 1.61 (s)                                              | 1.61 (s)                                                | 25.9                                                     | 25.9                                                       |
| <b>22</b>  | 1.74 (s)                                              | 1.73 (s)                                                | 14.3                                                     | 14.3                                                       |
| <b>23</b>  | 1.01 (d, $J = 5.2$ )                                  | 1.01 (d, $J = 8.0$ Hz)                                  | 17.6                                                     | 17.7                                                       |

Comparison of the  $^1\text{H}$  and  $^{13}\text{C}$  NMR spectra of natural<sup>2</sup> and synthetic yezo'otogirin C (**3**).

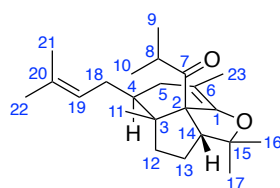

**3**: yezo'otogirin C

| Assignment | Natural $^1\text{H}$ NMR<br>$\text{CDCl}_3^*$                   | Synthetic $^1\text{H}$ NMR<br>$\text{CDCl}_3$ , 600 MHz         | Natural $^{13}\text{C}$ NMR<br>$\text{CDCl}_3^*$ | Synthetic $^{13}\text{C}$ NMR<br>$\text{CDCl}_3$ , 150 MHz |
|------------|-----------------------------------------------------------------|-----------------------------------------------------------------|--------------------------------------------------|------------------------------------------------------------|
| <b>1</b>   |                                                                 |                                                                 | 149.3                                            | 149.2                                                      |
| <b>2</b>   |                                                                 |                                                                 | 73.6                                             | 73.6                                                       |
| <b>3</b>   |                                                                 |                                                                 | 48.5                                             | 48.5                                                       |
| <b>4</b>   | 1.22 (m)                                                        | 1.23 (tt, $J = 11.4, 3.0$ Hz)                                   | 47.0                                             | 47.0                                                       |
| <b>5</b>   | 1.98 (dd, $J = 15.3, 11.4$ Hz)<br>1.86 (dd, $J = 15.3, 3.0$ Hz) | 1.96 (dd, $J = 14.8, 11.6$ Hz)<br>1.86 (dd, $J = 15.5, 3.3$ Hz) | 32.8                                             | 32.7                                                       |
| <b>6</b>   |                                                                 |                                                                 | 107.5                                            | 107.5                                                      |
| <b>7</b>   |                                                                 |                                                                 | 217.4                                            | 217.4                                                      |
| <b>8</b>   | 2.96 (hept, $J = 6.6$ Hz)                                       | 2.96 (hept, $J = 6.6$ Hz)                                       | 37.9                                             | 37.9                                                       |
| <b>9</b>   | 1.01 (d, $J = 6.6$ Hz)                                          | 1.02 (d, $J = 6.6$ Hz)                                          | 18.3                                             | 18.3                                                       |
| <b>10</b>  | 1.01 (d, $J = 6.6$ Hz)                                          | 1.01 (d, $J = 6.6$ Hz)                                          | 21.5                                             | 21.5                                                       |
| <b>11</b>  | 0.75 (s)                                                        | 0.75 (s)                                                        | 19.6                                             | 19.6                                                       |
| <b>12</b>  | 1.75 (m)<br>1.46 (m)                                            | 1.76 – 1.74 (m)<br>1.56 – 1.52 (m)                              | 41.5                                             | 41.5                                                       |
| <b>13</b>  | 1.54 (m)                                                        | 1.56 – 1.52 (m)                                                 | 25.4                                             | 25.4                                                       |
| <b>14</b>  | 3.18 (t, $J = 9.6$ Hz)                                          | 3.19 (dd, $J = 10.2, 9.0$ Hz)                                   | 54.9                                             | 54.9                                                       |
| <b>15</b>  |                                                                 |                                                                 | 83.4                                             | 83.4                                                       |
| <b>16</b>  | 1.14 (s)                                                        | 1.15 (s)                                                        | 29.4                                             | 29.5                                                       |
| <b>17</b>  | 1.18 (s)                                                        | 1.18 (s)                                                        | 25.4                                             | 25.4                                                       |
| <b>18</b>  | 1.93 (m)<br>1.81 (m)                                            | 1.94 (dd, $J = 11.1, 1.0$ Hz)<br>1.84 – 1.80 (m)                | 29.6                                             | 29.6                                                       |
| <b>19</b>  | 5.11 (t, $J = 6.9$ Hz)                                          | 5.13 – 5.10 (m)                                                 | 124.2                                            | 124.2                                                      |
| <b>20</b>  |                                                                 |                                                                 | 132.3                                            | 132.4                                                      |
| <b>21</b>  | 1.72 (s)                                                        | 1.73 (s)                                                        | 25.8                                             | 25.9                                                       |
| <b>22</b>  | 1.60 (s)                                                        | 1.61 (s)                                                        | 17.8                                             | 17.9                                                       |
| <b>23</b>  | 1.70 (s)                                                        | 1.71 (s)                                                        | 16.3                                             | 16.3                                                       |

\*The operation frequency is not specified in the isolation paper.

Comparison of the  $^1\text{H}$  and  $^{13}\text{C}$  NMR spectra of natural<sup>3</sup> and synthetic hypermogenin D (**4**)

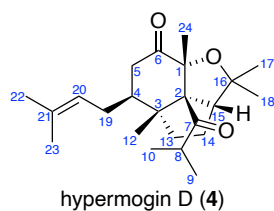

| Assignment | Natural $^1\text{H}$ NMR<br>$\text{CDCl}_3$ , 600 MHz | Synthetic $^1\text{H}$ NMR<br>$\text{CDCl}_3$ , 500 MHz | Natural $^{13}\text{C}$ NMR<br>$\text{CDCl}_3$ , 150 MHz | Synthetic $^{13}\text{C}$ NMR<br>$\text{CDCl}_3$ , 125 MHz |
|------------|-------------------------------------------------------|---------------------------------------------------------|----------------------------------------------------------|------------------------------------------------------------|
| 1          |                                                       |                                                         | 98.7                                                     | 98.7                                                       |
| 2          |                                                       |                                                         | 85.7                                                     | 85.7                                                       |
| 3          |                                                       |                                                         | 59.8                                                     | 59.8                                                       |
| 4          | 2.10 (m)                                              | 2.13 – 2.06 (m)                                         | 45.8                                                     | 45.8                                                       |
| 5          | 1.93 (m)<br>1.66 (m)                                  | 2.17 – 1.89 (m)                                         | 43.2                                                     | 43.2                                                       |
| 6          |                                                       |                                                         | 208.7                                                    | 208.7                                                      |
| 7          |                                                       |                                                         | 215.4                                                    | 215.4                                                      |
| 8          | 2.91 (m)                                              | 2.94 – 2.85 (m)                                         | 38.3                                                     | 38.3                                                       |
| 9          | 1.06 (d, $J = 6.5$ )                                  | 1.04 (d, $J = 6.6$ Hz)                                  | 18.4                                                     | 18.4                                                       |
| 10         | 1.24 (d, $J = 6.5$ )                                  | 1.22 (d, $J = 6.6$ Hz)                                  | 21.1                                                     | 21.0                                                       |
| 11         |                                                       |                                                         |                                                          |                                                            |
| 12         | 0.87 (s)                                              | 0.85 (s)                                                | 19.7                                                     | 19.8                                                       |
| 13         | 2.13 (m)                                              | 2.17 – 1.89 (m)<br>1.66 – 1.63 (m)                      | 41.2                                                     | 41.3                                                       |
| 14         | 2.05 (m)<br>1.94 (m)                                  | 2.17 – 1.89 (m)                                         | 28.4                                                     | 28.4                                                       |
| 15         | 3.09<br>(dd, $J = 8.2, 6.2$ )                         | 3.07<br>(dd, $J = 8.3, 6.4$ Hz)                         | 57.3                                                     | 57.4                                                       |
| 16         |                                                       |                                                         | 88.6                                                     | 88.6                                                       |
| 17         | 1.34 (s)                                              | 1.32 (s)                                                | 25.8                                                     | 25.8                                                       |
| 18         | 1.33 (s)                                              | 1.32 (s)                                                | 30.9                                                     | 30.9                                                       |
| 19         | 2.05 (m)<br>1.99 (m)                                  | 2.17 – 1.89 (m)                                         | 28.3                                                     | 28.3                                                       |
| 20         | 5.11 (t, $J = 6.5$ )                                  | 5.10 (t, $J = 7.1$ Hz)                                  | 123.3                                                    | 123.3                                                      |
| 21         |                                                       |                                                         | 132.1                                                    | 132.1                                                      |
| 22         | 1.70 (s)                                              | 1.68 (s)                                                | 17.8                                                     | 17.8                                                       |
| 23         | 1.62 (s)                                              | 1.61 (s)                                                | 26.3                                                     | 26.3                                                       |
| 24         | 2.22 (s)                                              | 2.20 (s)                                                | 28.0                                                     | 28.0                                                       |

Comparison of the  $^1\text{H}$  and  $^{13}\text{C}$  NMR spectra of natural<sup>4</sup> and synthetic norascyronone C (**10**)

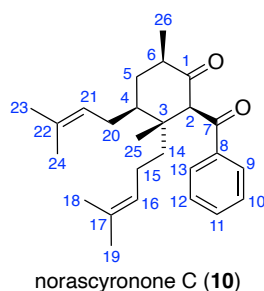

| Assignment | Natural $^1\text{H}$ NMR<br>$\text{CDCl}_3$ , 600 MHz | Synthetic $^1\text{H}$ NMR<br>$\text{CDCl}_3$ , 500 MHz | Natural $^{13}\text{C}$ NMR<br>$\text{CDCl}_3$ , 150 MHz | Synthetic $^{13}\text{C}$ NMR<br>$\text{CDCl}_3$ , 125 MHz |
|------------|-------------------------------------------------------|---------------------------------------------------------|----------------------------------------------------------|------------------------------------------------------------|
| 1          | -                                                     | -                                                       | 209.6                                                    | 209.6                                                      |
| 2          | 4.55 (s)                                              | 4.60 (s)                                                | 63.7                                                     | 63.6                                                       |
| 3          | -                                                     | -                                                       | 46.3                                                     | 46.5                                                       |
| 4          | 1.94 (m)                                              | 2.03 – 1.95 (m)                                         | 42.8                                                     | 43.1                                                       |
| 5          | 2.13, m<br>1.25 (q, $J = 12.3$ Hz)                    | 2.23 – 2.19 (m)<br>1.33 – 1.28 (m)                      | 37.1                                                     | 37.4                                                       |
| 6          | 2.55 (m)                                              | 2.60 (dp, $J = 12.8$ ,<br>6.6 Hz)                       | 45.4                                                     | 45.6                                                       |
| 7          | -                                                     | -                                                       | 196.8                                                    | 197.0                                                      |
| 8          | -                                                     | -                                                       | 138.5                                                    | 138.8                                                      |
| 9          | 7.71 (d, $J = 7.8$ Hz)                                | 7.77 (d, $J = 7.3$ Hz)                                  | 127.5                                                    | 127.7                                                      |
| 10         | 7.35 (t, $J = 7.8$ Hz)                                | 7.41 (t, $J = 7.7$ Hz)                                  | 128.6                                                    | 128.8                                                      |
| 11         | 7.44 (t, $J = 7.8$ Hz)                                | 7.50 (t, $J = 7.4$ Hz)                                  | 132.7                                                    | 132.8                                                      |
| 12         | 7.35 (t, $J = 7.8$ Hz)                                | 7.41 (t, $J = 7.7$ Hz)                                  | 128.6                                                    | 128.8                                                      |
| 13         | 7.71 (d, $J = 7.8$ Hz)                                | 7.77 (d, $J = 7.3$ Hz)                                  | 127.5                                                    | 127.7                                                      |
| 14         | 1.50 (m)                                              | 1.60 – 1.54 (m)                                         | 36.4                                                     | 36.7                                                       |
| 15         | 1.91 (overlap)<br>1.65 (m)                            | 2.03 – 1.95 (m)<br>1.74 – 1.69 (m)                      | 22.0                                                     | 22.3                                                       |
| 16         | 4.80 (t, $J = 7.0$ Hz)                                | 4.87 (t, $J = 7.1$ Hz)                                  | 123.6                                                    | 123.8                                                      |
| 17         | -                                                     | -                                                       | 131.7                                                    | 131.9                                                      |
| 18         | 1.44 (s)                                              | 1.50 (s)                                                | 25.5                                                     | 25.7                                                       |
| 19         | 1.27 (s)                                              | 1.34 (s)                                                | 17.3                                                     | 17.5                                                       |
| 20         | 2.11 (m)<br>1.70 (overlap)                            | 2.19 – 2.15 (m)<br>1.78 – 1.75 (m)                      | 26.9                                                     | 27.2                                                       |
| 21         | 5.09 (t, $J = 7.2$ Hz)                                | 5.16 (t, $J = 7.2$ Hz)                                  | 123.0                                                    | 123.2                                                      |
| 22         | -                                                     | -                                                       | 132.9                                                    | 133.1                                                      |
| 23         | 1.56 (s)                                              | 1.63 (s)                                                | 17.9                                                     | 18.1                                                       |
| 24         | 1.68 (s)                                              | 1.75 (s)                                                | 25.9                                                     | 26.1                                                       |
| 25         | 1.07 (s)                                              | 1.14 (s)                                                | 17.6                                                     | 17.8                                                       |
| 26         | 0.98 (d, $J = 6.6$ Hz)                                | 1.04 (d, $J = 6.4$ Hz)                                  | 14.4                                                     | 14.6                                                       |



## References:

1. W. Gao, J.-W. Hu, W.-Z. Hou, F. Xu, J. Zhao, F. Xu, H. Sun, J.-G. Xing, Y. Peng, X.-L. Wang, T.-F. Ji, L. Li and Z.-Y. Gu, *Tetrahedron Lett.*, 2016, **57**, 2244.
2. N. Tanaka, Y. Kakuguchi, H. Ishiyama, T. Kubota and J. Kobayashi, *Tetrahedron Lett.*, 2009, **50**, 4747.
3. Y. Zeng, J. Yang, Y. Li, W. Gu, L. Huang, P. Yi, C. Yuan and X. Hao, *Tetrahedron Lett.*, 2021, **64**, 152733.
4. Y.-L. Hu, K. Hu, L.-M. Kong, F. Xia, X.-W. Yang and G. Xu, *Org. Lett.*, 2019, **21**, 1007.
